# Supplementary material for: Health profiles and racial disparities among individuals on probation in Hennepin County, Minnesota, 2016: a cross-sectional study
Source: PubMed Central journal article supplement — BMJ Open. 2021 Sep 2;11(9):e047930. doi: 10.1136/bmjopen-2020-047930 (PMC8413954; doi:10.1136/bmjopen-2020-047930), 2021-09-02
Supplement: bmjopen-2020-047930.draft_revisions.pdf [file bmjopen-2020-047930.draft_revisions.pdf]

# BMJ Open

BMJ Open is committed to open peer review. As part of this commitment we make the peer review history of every article we publish publicly available.

When an article is published we post the peer reviewers' comments and the authors' responses online. We also post the versions of the paper that were used during peer review. These are the versions that the peer review comments apply to.

The versions of the paper that follow are the versions that were submitted during the peer review process. They are not the versions of record or the final published versions. They should not be cited or distributed as the published version of this manuscript.

BMJ Open is an open access journal and the full, final, typeset and author-corrected version of record of the manuscript is available on our site with no access controls, subscription charges or pay-per-view fees (<http://bmjopen.bmj.com>).

If you have any questions on BMJ Open's open peer review process please email [info.bmjopen@bmj.com](mailto:info.bmjopen@bmj.com)

# BMJ Open

## Health profiles and racial disparities among individuals on probation in Hennepin County, 2016: a cross-sectional study

|                               |                                                                                                                                                                                                                                                                                                                                                                                                                                                                                                                                                                                                          |
|-------------------------------|----------------------------------------------------------------------------------------------------------------------------------------------------------------------------------------------------------------------------------------------------------------------------------------------------------------------------------------------------------------------------------------------------------------------------------------------------------------------------------------------------------------------------------------------------------------------------------------------------------|
| Journal:                      | <i>BMJ Open</i>                                                                                                                                                                                                                                                                                                                                                                                                                                                                                                                                                                                          |
| Manuscript ID                 | bmjopen-2020-047930                                                                                                                                                                                                                                                                                                                                                                                                                                                                                                                                                                                      |
| Article Type:                 | Original research                                                                                                                                                                                                                                                                                                                                                                                                                                                                                                                                                                                        |
| Date Submitted by the Author: | 16-Dec-2020                                                                                                                                                                                                                                                                                                                                                                                                                                                                                                                                                                                              |
| Complete List of Authors:     | Olson, Marin; University of Minnesota Medical School Twin Cities, Schlafer, Rebecca J.; University of Minnesota in Minneapolis, Department of Pediatrics<br>Bodurtha, Peter; Hennepin Healthcare Research Institute, Virtual Data Warehouse<br>Watkins, Jonathan; Hennepin County Center of Innovation and Excellence<br>Hougham, Courtney; Hennepin County, Department of Community Corrections and Rehabilitation<br>Winkelman, Tyler N.A.; Hennepin County Medical Center, Division of General Internal Medicine; Minneapolis Medical Research Foundation, Center for Patient and Provider Experience |
| Keywords:                     | PUBLIC HEALTH, Health policy < HEALTH SERVICES ADMINISTRATION & MANAGEMENT, EPIDEMIOLOGY                                                                                                                                                                                                                                                                                                                                                                                                                                                                                                                 |
|                               |                                                                                                                                                                                                                                                                                                                                                                                                                                                                                                                                                                                                          |

SCHOLARONE™  
Manuscripts

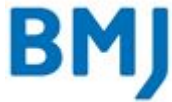

I, the Submitting Author has the right to grant and does grant on behalf of all authors of the Work (as defined in the below author licence), an exclusive licence and/or a non-exclusive licence for contributions from authors who are: i) UK Crown employees; ii) where BMJ has agreed a CC-BY licence shall apply, and/or iii) in accordance with the terms applicable for US Federal Government officers or employees acting as part of their official duties; on a worldwide, perpetual, irrevocable, royalty-free basis to BMJ Publishing Group Ltd ("BMJ") its licensees and where the relevant Journal is co-owned by BMJ to the co-owners of the Journal, to publish the Work in this journal and any other BMJ products and to exploit all rights, as set out in our [licence](#).

The Submitting Author accepts and understands that any supply made under these terms is made by BMJ to the Submitting Author unless you are acting as an employee on behalf of your employer or a postgraduate student of an affiliated institution which is paying any applicable article publishing charge ("APC") for Open Access articles. Where the Submitting Author wishes to make the Work available on an Open Access basis (and intends to pay the relevant APC), the terms of reuse of such Open Access shall be governed by a Creative Commons licence – details of these licences and which [Creative Commons](#) licence will apply to this Work are set out in our licence referred to above.

Other than as permitted in any relevant BMJ Author's Self Archiving Policies, I confirm this Work has not been accepted for publication elsewhere, is not being considered for publication elsewhere and does not duplicate material already published. I confirm all authors consent to publication of this Work and authorise the granting of this licence.

1  
2  
3 **Health profiles and racial disparities among individuals on probation in Hennepin County,**  
4 **2016: a cross-sectional study**  
5  
6  
7

8 *Marin Olson,<sup>1</sup> Rebecca J. Shlafer,<sup>2</sup> Peter Bodurtha,<sup>3</sup> Jonathan Watkins<sup>4</sup>, Courtney Hougham<sup>5</sup>,*  
9 *Tyler N.A. Winkelman<sup>6,7</sup>*  
10  
11

12  
13 <sup>1</sup>*University of Minnesota Medical School, Minneapolis, MN*  
14

15 <sup>2</sup>*Department of Pediatrics, University of Minnesota Medical School, Minneapolis, MN*  
16

17 <sup>3</sup>*Virtual Data Warehouse, Hennepin Healthcare Research Institute, Minneapolis, MN*  
18

19 <sup>4</sup>*Hennepin County Center of Innovation and Excellence, Minneapolis, MN*  
20

21 <sup>5</sup>*Department of Community Corrections and Rehabilitation, Hennepin County, Minneapolis, MN*  
22

23 <sup>6</sup>*Health, Homelessness, and Criminal Justice Lab, Hennepin Healthcare Research Institute,*  
24 *Minneapolis, MN*  
25

26 <sup>7</sup>*General Internal Medicine, Department of Medicine, Hennepin Healthcare, Minneapolis, MN*  
27  
28

29 **Word count:** 2,963  
30

31 **Abstract word count:** 247/250  
32

33 **References:** 21  
34

35 **Figures:** 5 tables, 1 supplemental table  
36  
37

38 **Corresponding Author:** *Tyler N.A. Winkelman, MD, MSc, Division of General Internal*  
39 *Medicine, Department of Medicine, Hennepin Healthcare, 701 Park Ave, Ste S2.309,*  
40 *Minneapolis, MN 55415 (tyler.winkelman@hcmh.org).*  
41  
42  
43  
44  
45  
46  
47  
48  
49  
50  
51  
52  
53  
54  
55  
56  
57  
58  
59  
60

## ABSTRACT

**Objectives:** To estimate the health characteristics and racial/ethnic health disparities among a probation cohort in Hennepin County. We hypothesized the probation population would have higher health needs compared to the general population as well as significant racial/ethnic health disparities.

**Design:** Cross-sectional study using linked administrative records.

**Participants:** Of 7,992 eligible individuals on high-level probation, 5,873 met inclusion criteria including six or more months of eligibility for full-benefit Minnesota health care plan. Individuals on warrant status were excluded.

**Setting:** High-level probation system in Hennepin County in 2016.

**Outcomes:** We compared health condition prevalence among our probation cohort to survey data from the general population and analyzed by race/ethnicity. We also measured sociodemographic characteristics, including the use of safety-net services.

**Results:** Individuals were predominantly male (80.5%), young (mean age: 35.5), and disproportionately Black or African American (52.9%). A majority of individuals enrolled in Medicaid were eligible via Medicaid expansion (65.9%). Rates of substance use disorders were more than eight times higher (66.5% vs 8.1%) and rates of mental illness were nearly four times higher (55.3% vs 14.4%) compared with the general population. White individuals on probation were significantly more likely than Black or African American individuals to have a diagnosed substance use disorder (71.6% vs 62.0%) or mental health disorder (64.9% vs 48.5%), but less likely to have chronic physical health conditions.

1  
2  
3 **Conclusions:** Individuals on probation have high health needs, which vary substantially by  
4 race/ethnicity. Without attention to this variation, interventions to address health conditions in  
5 this population could worsen racial/ethnic disparities.  
6  
7  
8  
9  
10

## 11 **ARTICLE SUMMARY**

### 12 **Strengths and limitations of this study**

- 13 • This study describes the probation population using linked county administrative and  
14 electronic health record data sets.
- 15 • Health conditions were determined by electronic health record diagnosis codes and  
16 probation status was determined by county data, eliminating recall and social desirability  
17 bias.
- 18 • Analyzing linked data sets provides county-specific, granular information that can inform  
19 local policies.
- 20 • Results were restricted to individuals in Hennepin County, Minnesota, and may not be  
21 generalizable.
- 22  
23  
24  
25  
26  
27  
28  
29  
30  
31  
32  
33  
34  
35  
36  
37  
38  
39  
40  
41  
42  
43  
44  
45  
46  
47  
48  
49  
50  
51  
52  
53  
54  
55  
56  
57  
58  
59  
60

## INTRODUCTION

More than 3.5 million individuals are on probation in the United States, accounting for nearly 1 in 70 US citizens and totaling more than jail and prison populations combined.<sup>1-3</sup> Probation is an alternative to incarceration, meaning continued criminal justice reform measures may shift more individuals to serve sentences outside of prisons and jails.<sup>4</sup> People on probation have higher rates of many health conditions, including physical health, mental health, and substance use conditions, compared to the general population.<sup>5</sup> Nearly one-quarter of people recently on probation report having a disability.<sup>6</sup> Age-adjusted studies have also shown that individuals on probation have a higher mortality rate than the general public.<sup>7</sup> In addition to their complex health needs, individuals on probation also experience increased barriers to accessing outpatient medical care and disproportionately use emergency department and inpatient care, regardless of insurance status.<sup>5</sup> Justice-involved populations also have considerable social barriers, with high rates of housing insecurity, poverty, and unemployment.<sup>8</sup>

To date, estimates of the health and health care use patterns of probation populations have largely relied on national survey data and include both people currently on probation as well as people who were recently on probation.<sup>5, 6</sup> These studies are scarce in number and limited by self-reporting bias, social desirability bias, and an inability to verify both disease diagnoses and probation status. Additionally, these approaches require primary data collection and do not capture local patterns in disease prevalence or corrections practices. Local and regional data are needed to inform tailored health interventions that improve access and health outcomes for individuals on probation.

1  
2  
3 Relative to periods of incarceration, there are unique challenges and opportunities to improve  
4 care and reduce health inequities during probation. While health care is constitutionally required  
5 for individuals who are incarcerated, no such obligation exists for individuals on probation.<sup>9</sup> Yet,  
6 because individuals on probation are not incarcerated, they are able to access services in the  
7 community that do not exist in jails and prisons. For example, the Medicaid inmate exclusion  
8 policy prohibits incarcerated individuals from receiving care through Medicaid.<sup>10</sup> Because  
9 people on probation serve sentences in the community, they are able to maintain Medicaid  
10 eligibility and enrollment. Thus, individuals on probation represent a large group with poorly  
11 defined health profiles that could benefit from well-designed health interventions implemented  
12 within the civilian health care system.  
13  
14  
15  
16  
17  
18  
19  
20  
21  
22  
23  
24  
25  
26  
27

28 To address gaps in the extant literature, we estimated the health characteristics and racial/ethnic  
29 health disparities among a probation cohort in Hennepin County using linked administrative  
30 records. By linking administrative data, we sought to utilize individual-level data to provide  
31 granular information about health to inform interventions and practice at the county level. We  
32 hypothesized that individuals on probation would have more health needs than general  
33 population estimates and that there would be substantial differences in health conditions by race  
34 and ethnicity.  
35  
36  
37  
38  
39  
40  
41  
42  
43  
44  
45  
46

## 47 **METHODS**

### 48 **Participants and data sources**

49 We used health care claims and administrative probation data to describe health characteristics  
50 and disparities among individuals assigned to high-level probation at any point in 2016 with the  
51  
52  
53  
54  
55  
56  
57  
58  
59  
60



1  
2  
3 Hennepin County Department of Community Corrections and Rehabilitation (DOCCR). High-  
4  
5 level probation supervision is designed for individuals assessed as being at higher risk of re-  
6  
7 offense and assigns one probation officer to oversee 40 individuals on probation. Clients  
8  
9 typically meet with their probation officer once a month to discuss compliance with their  
10  
11 probation conditions and other needs or problems they might have. We included individuals  
12  
13 under violation status (i.e., those who were in violation of their probation conditions) because  
14  
15 they likely still had contact with their probation officer and thus remained on probation in a  
16  
17 meaningful way. We excluded people on warrant status because warrants are typically issued  
18  
19 when someone cannot be located, and thus cannot actively be involved in probation. Individuals  
20  
21 were included in our final cohort if they had six or more months of enrollment for a full-benefit  
22  
23 Minnesota public health insurance program between Jan 1, 2013 and Dec 31, 2016 and were  
24  
25 adults age 18 or older on probation in 2016.  
26  
27  
28  
29  
30  
31  
32

33 Health and health insurance enrollment data were drawn from claims from any Minnesota public  
34  
35 health care plan, but primarily consisted of programs available through the Affordable Care Act:  
36  
37 Medicaid expansion, for individuals with incomes  $\leq$  138% of the federal poverty level (FPL),  
38  
39 and MinnesotaCare, the basic health plan for individual  $>$  138% FPL and  $\leq$  200% FPL. Criminal  
40  
41 justice data came from multiple sources, including DOCCR probation records, court  
42  
43 administrative data, and statewide incarceration data. Housing and social service data came from  
44  
45 Hennepin County administrative records. Health and criminal justice data were linked using *Link*  
46  
47 *Plus* to probabilistically match on name and date of birth. Social service and housing data were  
48  
49 linked to health data using a county-assigned, person-specific ID.  
50  
51  
52  
53  
54  
55  
56  
57  
58  
59  
60

1  
2  
3 For our general population comparisons, we used the Behavioral Risk Factor Surveillance  
4 System (BRFSS) to ascertain the general population prevalence of several physical health  
5 conditions in Minnesota. BRFSS is conducted by the US Centers for Disease Control and  
6 Prevention and is a telephone-based survey.<sup>11</sup> We used the 2015-2016 National Survey on Drug  
7 Use and Health (NSDUH) for national rates of substance use disorder (SUD) and mental health  
8 conditions in the general population.<sup>12, 13</sup> NSDUH does not provide state-level variables in its  
9 public use data file. NSDUH is conducted by the US Substance Abuse and Mental Health  
10 Services Administration and is a household survey conducted by a trained interviewer. Both  
11 BRFSS and NSDUH are widely used, population-based surveys that are intended to provide  
12 national and state-level estimates of physical health, mental health, and substance use conditions.  
13  
14 Though NSDUH does not contain granular information about mental health conditions, the  
15 survey does estimate levels of current depression in the United States, as well as any mental  
16 illness and any serious mental illness.

### 32 **Patient and Public Involvement**

33  
34 Patients or the public were not involved in designing, conducting, reporting, or plans for  
35 disseminating our research.

### 36 **Outcomes**

37  
38 We used International Classification of Diseases (ICD) codes to assess physical health, mental  
39 health, and substance use diagnoses. ICD ninth revision codes (ICD-9) were used for conditions  
40 documented between January 1, 2013 and September 30, 2015 and ICD tenth revision codes  
41 (ICD-10) were used for diagnoses documented between October 1, 2015 and December 31,  
42 2016. Chronic Condition Data Warehouse (CCW) Chronic Condition Categories were used to  
43 group diagnosis codes to describe physical and mental health conditions.<sup>14</sup> Physical health  
44  
45  
46  
47  
48  
49  
50  
51  
52  
53  
54  
55  
56  
57  
58  
59  
60

1  
2  
3 conditions included hypertension, heart disease, cancer, asthma, arthritis, diabetes, chronic  
4 kidney disease, chronic obstructive pulmonary disease (COPD), and viral hepatitis. We also  
5  
6 estimated pregnancy within the last twelve months of ending probation. Mental health diagnoses  
7  
8 included depression, anxiety, bipolar disorder, post-traumatic stress disorder (PTSD), and  
9  
10 schizophrenia and other psychotic disorders. The latter category, schizophrenia and other  
11  
12 psychotic disorders, we defined as a comparator to NSDUH's estimates of serious mental illness.  
13  
14  
15 SUD groupings were derived from Healthcare Cost and Utilization Project definitions.<sup>15, 16</sup>  
16  
17  
18 Conditions included alcohol, cannabis, opioid, methamphetamine, cocaine/crack, sedatives, or  
19  
20 unspecified/other SUDs.  
21  
22  
23  
24  
25

### 26 **Sociodemographic characteristics**

27  
28 We examined a range of sociodemographic factors including age, gender, race/ethnicity, health  
29 insurance enrollment, employment status, education level, number of children, and marital status.  
30  
31 Health insurance type was determined by any full or partial month of enrollment at any point  
32  
33 while on probation in 2016. Sociodemographic variables, with the exception of health insurance  
34  
35 enrollment, were determined based on DOCCR administrative data.  
36  
37  
38  
39  
40  
41

42 To better understand the non-health care needs of individuals on probation, we also examined  
43  
44 use of other safety-net services. We estimated the number of individuals who used a variety of  
45  
46 social programs, including the supplemental nutrition assistance program (SNAP), general  
47  
48 assistance, temporary assistance for needy families (TANF), or cash assistance. We also assessed  
49  
50 the proportion of individuals who used emergency shelter or supportive housing services.  
51  
52  
53  
54  
55  
56  
57  
58  
59  
60

## Statistical Analysis

We first described sociodemographic characteristics among all individuals on high-level probation and then stratified characteristics by race/ethnicity.

Next, we described the proportion of individuals on probation who used social services and housing supports. We examined use of these services at any point while an individual who met our health insurance enrollment criteria was on probation in 2016.

We then analyzed the unadjusted prevalence of health conditions among our probation cohort using ICD9 and ICD10 codes. To provide comparisons to disease prevalence data in the general population, we compared rates of physical health conditions among individuals in our probation cohort to the general population in Minnesota using data from BRFSS. Similarly, we compared rates of certain substance use and mental health diagnoses to similar conditions among a national population in NSDUH. Comparisons between our probation cohort and survey populations were estimated using linear probability models and were adjusted for age and gender to eliminate confounding health risk factors. For comparisons to national data, each observation in the high-supervision probation data was assigned single unit weight. Weights for observations from national and state survey data were re-scaled to match the size of the high-level supervision probation cohort before performing comparisons. We generated predicted probabilities adjusted for age and gender using Stata's *margins* command and set covariates at mean values of our probation cohort.

1  
2  
3 Finally, we evaluated rates of health conditions among individuals on probation by race and  
4 ethnicity and assessed the significance of these differences after adjusting for age and gender.  
5  
6  
7

8  
9  
10 This study was approved by the Hennepin Healthcare Institutional Review Board. All analyses  
11 used *Stata* 15.1 (College Station, TX). We considered  $P < .05$  to be statistically significant.  
12  
13  
14

## 15 16 17 **RESULTS**

### 18 19 **Sociodemographic characteristics of individuals on high-level probation**

20  
21 Of the 7,992 adults on high-level probation in Hennepin county in 2016, our sample consisted of  
22 5,873 adults who met enrollment criteria (**Table 1**). Individuals on high level probation in  
23 Hennepin County were predominantly young (mean age 35.5), male (80.5%) and Black or  
24 African American (52.9%). They were frequently unemployed (38.2%) and, among those with  
25 available data, the majority had one or more children (72.4%). Most individuals were enrolled in  
26 Medicaid (**Table 1**) while on probation in 2016 (80.7%). Of the individuals enrolled in  
27 Medicaid, a majority (65.9%) were eligible via Medicaid expansion under the Affordable Care  
28 Act. Sociodemographic profiles varied considerably by race and ethnicity (**Supplemental 1**).  
29  
30  
31  
32  
33  
34  
35  
36  
37  
38  
39  
40

### 41 **Social service and housing services among individuals on probation**

42  
43 Over half of individuals on probation received food support (**Table 2**), and 39.2% received some  
44 form of income support while on probation. General Assistance was the most common at 27.1%.  
45  
46 Approximately 6.8% utilized shelter or supportive housing services while on probation in 2016.  
47  
48  
49  
50

### 51 52 **Health characteristics of individuals on high-level probation**

1  
2  
3 In unadjusted analyses, 35.0% of individuals on probation in Hennepin County had one or more  
4 chronic physical health condition despite a mean age of 35.5 (**Table 3**). Hypertension (17.3%)  
5 and asthma (14.3%) were the most common physical health conditions. A majority of individuals  
6 had either a diagnosed SUD (66.4%) or mental health diagnosis (55.0%). Among the diagnosed  
7 SUDs, alcohol use disorder was the most common (41.2%), followed by cannabis (29.0%) and  
8 opioids (18.3%). Among diagnosed mental health conditions, anxiety and depression were most  
9 common (42.9% and 41.9%, respectively). Close to half of the individuals on probation had both  
10 a diagnosed SUD and mental health condition (44.9%).  
11  
12  
13  
14  
15  
16  
17  
18  
19  
20  
21  
22  
23

#### 24 **Health characteristics of individuals on high-level probation compared to general** 25 **population estimates** 26

27  
28 In adjusted analyses, individuals on probation in Hennepin County were significantly more likely  
29 ( $P<.001$ ) to have nearly all physical health conditions measured in this study as compared to the  
30 general population in Minnesota, with the exception of arthritis (**Table 4**).  
31  
32  
33  
34  
35  
36  
37

38 Individuals on probation in Hennepin County were significantly more likely ( $P<.001$ ) to have  
39 any of the reported diagnosed SUDs (66.5% vs. 8.1%), as well as any mental health condition  
40 (55.3% vs. 14.4%) compared with a national sample from NSDUH (**Table 4**). Specifically,  
41 individuals on probation in Hennepin County were more likely to have a diagnosis of severe  
42 mental illness (12.5% vs. 4.3%) and depression (41.6% vs. 9.4%) as compared to the general  
43 population. Individuals on probation in Hennepin County were nearly twenty times more likely  
44 to have both a diagnosed SUD and mental health condition compared with the general population  
45 (44.7% vs. 2.6%).  
46  
47  
48  
49  
50  
51  
52  
53  
54  
55  
56  
57  
58  
59  
60

### Health characteristics of individuals on probation by race/ethnicity

Among individuals on probation in Hennepin County, Black or African American individuals had significantly higher rates of physical health diagnoses when compared with white, non-Hispanic individuals (**Table 5**). Black or African American individuals were less likely to have a diagnosed SUD or mental health conditions when compared with white, non-Hispanic individuals, (62.0% vs. 71.6%,  $P<.001$ ; 48.5% vs. 64.9%,  $P<.001$ ), but had significantly higher rates of several select conditions, including cannabis use (30.7%), cocaine use (17.6%) and severe mental illness (13.6%). White, non-Hispanic individuals had the highest rates of diagnosed methamphetamine use disorders (29.1%) compared with other race/ethnicity subcategories. Native American individuals had the highest rates of diagnosed opioid use disorder compared to other race or ethnic groups, with rates nearly double that of white, non-Hispanics. However, white, non-Hispanic individuals had diagnosed opioid use disorder at over twice the rate of Black or African American and Asian or Pacific Island individuals. Overall, white, non-Hispanic and Native American individuals had the highest rates of many mental health condition diagnoses.

### DISCUSSION

In this analysis of linked cross-sector administrative data, we found that individuals on probation had high rates of chronic physical, mental health, and substance use conditions compared to general population estimates. Individuals on probation had poorer health compared with the general population in nearly every assessed category. Substance use and mental health conditions were particularly prevalent, with 44.9% of individuals on probation having simultaneous

1  
2  
3 diagnoses for substance use and mental health conditions. These findings add to a growing body  
4  
5 of literature that indicate individuals on probation have substantial physical and behavioral health  
6  
7 needs, which necessitate access to quality health care while on supervision. We additionally  
8  
9 show that local administrative data can be used to glean important insights about the health of  
10  
11 this key population, without requiring primary data collection, and provide more detailed  
12  
13 information related to mental health and substance use diagnoses. For example, we quantified the  
14  
15 prevalence of specific SUDs and mental health diagnoses. For example, we quantified the  
16  
17 prevalence of specific SUDs and mental health diagnoses to show that use of multiple different  
18  
19 substances is common within this population, as are numerous coexisting mental health  
20  
21 diagnoses, suggesting that interventions focused on one particular substance or mental health  
22  
23 condition may not be effective.  
24  
25  
26  
27

28 Consistent with previous studies of health in justice-involved populations, we found significant  
29  
30 health differences between racial and ethnic groups in our probation cohort.<sup>17,18</sup> Unlike previous  
31  
32 national studies which found similar rates of chronic disease among white, Black, and Native  
33  
34 American individuals, we found higher levels of physical health conditions among Black and  
35  
36 Native American individuals compared with white, non-Hispanic individuals.<sup>4</sup> However, our  
37  
38 findings are consistent with other work using NSDUH that found self-reported mental illness  
39  
40 was higher among white, non-Hispanic individuals compared with other racial and ethnic  
41  
42 groups.<sup>19-21</sup> We build on this work using diagnosed conditions to show that anxiety, bipolar  
43  
44 disorder, and depression were more highly diagnosed among white, non-Hispanic individuals on  
45  
46 probation in Hennepin County, but not PTSD nor schizophrenia and other psychotic disorders.  
47  
48 We found that, in fact, severe mental illness (e.g., schizophrenia and other psychotic disorders)  
49  
50 was more highly diagnosed among Black individuals, while lower severity mental illness (e.g.,  
51  
52  
53  
54  
55  
56  
57  
58  
59  
60



1  
2  
3 anxiety and depression) was less diagnosed compared with white, non-Hispanics. White, non-  
4  
5 Hispanic and Native American individuals on probation were far more likely to have any  
6  
7 diagnosed SUD compared with other racial or ethnic groups. However, for certain SUDs, such as  
8  
9 cannabis and cocaine, Black or African American and Native American individuals had higher  
10  
11 rates compared with white, non-Hispanic individuals.  
12  
13  
14  
15

16  
17 Our findings can inform interventions specific to the unique barriers and opportunities that exist  
18  
19 during a period of probation. For example, given the rates of physical, mental, and substance use  
20  
21 conditions, individuals on probation should have the opportunity to connect with a trusted health  
22  
23 care partner to assess, diagnose, and treat underlying medical conditions. These assessments  
24  
25 should be free of coercion and should not be predicated on the conditions of supervision.  
26  
27 Probation offices should prioritize programs that help clients enroll in and maintain health  
28  
29 insurance, particularly in Medicaid expansion states, and social services. Finally, the  
30  
31 disaggregation of health conditions by race and ethnicity can inform interventions that mitigate  
32  
33 rather than exacerbate existing health inequities. For example, there is a potential for  
34  
35 interventions to unintentionally worsen racial/ethnic disparities when access to substance-  
36  
37 specific treatment is prioritized. Our data suggest that an isolated focus on more prevalent  
38  
39 substances, such as opioids or methamphetamine, could contribute to and perpetuate racial  
40  
41 inequities without expanding interventions to substances more common among non-white  
42  
43 populations. Programs that provide access to treatment for any type of substance use are likely to  
44  
45 be more equitable.  
46  
47  
48  
49  
50  
51  
52  
53  
54  
55  
56  
57  
58  
59  
60

1  
2  
3 This study has several limitations. First, individuals were only included if they had six or more  
4 months of eligibility for a full-benefit Minnesota state health care plan in the previous three  
5  
6  
7 years. Omitting individuals who did not qualify for public health care plans could potentially  
8  
9  
10 drop individuals who have incomes too high to qualify for such plans. Second, although we  
11  
12 controlled for age and gender, our comparison populations of BRFSS for physical conditions and  
13  
14 NSDUH for mental health conditions and SUDs were self-reported conditions and we did not  
15  
16 have access to diagnosis information for a general population cohort. Finally, our study focused  
17  
18 on an urban, Midwest county and it is possible that our findings do not generalize when assessed  
19  
20 nationally, though they should be comparable to other urban jurisdictions.  
21  
22  
23  
24  
25

26 Our study describes the unique health needs of people on probation and highlights the  
27  
28 racial/ethnic differences that exist within this population. By linking local administrative data  
29  
30 across public sectors, jurisdictions can identify opportunities to improve programs and connect  
31  
32 individuals to needed resources. This work also highlights the importance of disaggregating  
33  
34 diagnoses by race and ethnicity to inform policy decisions. Often overlooked in discussions of  
35  
36 correctional health care, people on probation represent a key population for whom targeted  
37  
38 public health interventions could improve health and address existing inequities.  
39  
40  
41  
42  
43

## 44 **FUNDING**

45  
46 This project was supported with funding from the University of Minnesota's Grand Challenges  
47  
48 Research Initiative.  
49  
50  
51  
52  
53

## 54 **DATA AVAILABILITY**

1  
2  
3 Data are not available.  
4  
5  
6

7  
8 **CONTRIBUTORS**  
9

10 TNW was responsible for the study design, funding, and initial analysis. PB and JW performed  
11 the analyses. MGO, RJS, and TNW drafted the manuscript. CH critically revised the manuscript  
12 for important intellectual content. All authors read and approved the final manuscript.  
13  
14  
15  
16

17  
18  
19 **CONFLICT OF INTEREST**  
20

21 The authors have nothing to disclose.  
22  
23  
24  
25

26 **ETHICS APPROVAL**  
27

28 This study was approved by the Hennepin Healthcare Research Institute Institutional Review  
29 Board.  
30  
31  
32  
33  
34  
35  
36  
37  
38  
39  
40  
41  
42  
43  
44  
45  
46  
47  
48  
49  
50  
51  
52  
53  
54  
55  
56  
57  
58  
59  
60

**Table 1.** Demographics and public health insurance prevalence of individuals on high-level probation in Hennepin County, Minnesota, any time during 2016 and met MHCP enrollment criteria.

|                                                                                | HC probation cohort |       |
|--------------------------------------------------------------------------------|---------------------|-------|
|                                                                                | <i>n</i>            | %     |
| <b>Cohort</b>                                                                  |                     |       |
| High-level probation meeting enrollment criteria                               | 5873                | -     |
| Median age                                                                     | 33.0                |       |
| Mean age                                                                       | 35.5                |       |
| Male                                                                           | 4726                | 80.5% |
| <b>Race/ethnicity</b>                                                          |                     |       |
| White, non-Hispanic                                                            | 2055                | 35.0% |
| Black or African American                                                      | 3104                | 52.9% |
| Native American                                                                | 324                 | 5.5%  |
| Asian or Pacific Islander                                                      | 114                 | 1.9%  |
| Hispanic                                                                       | 212                 | 3.6%  |
| Other                                                                          | 64                  | 1.1%  |
| <b>Health insurance enrollment<br/>(While on high-level probation in 2016)</b> |                     |       |
| Any MHCP                                                                       | 5116                | 87.1% |
| Consolidated treatment fund                                                    | 1346                | 22.9% |
| Any full-benefit MHCP                                                          | 4931                | 84.0% |
| Medicaid                                                                       | 4742                | 80.7% |
| MinnesotaCare                                                                  | 5116                | 4.6%  |
| <b>Medicaid Eligibility Types (among those enrolled in Medicaid in 2016)</b>   |                     |       |
| Expansion                                                                      | 3126                | 65.9% |
| Disability, no Medicare/SS                                                     | 472                 | 10.0% |
| Disability, with Medicare/SS                                                   | 327                 | 6.9%  |
| Parent                                                                         | 808                 | 17.0% |
| Other                                                                          | 328                 | 6.9%  |
| <b>Employment</b>                                                              |                     |       |
| Part-time                                                                      | 1039                | 17.7% |
| Full-time                                                                      | 1347                | 22.9% |
| Unemployed                                                                     | 2242                | 38.2% |
| Other                                                                          | 131                 | 2.2%  |
| Unknown                                                                        | 1114                | 19.0% |
| <b>Education</b>                                                               |                     |       |
| High school, not completed                                                     | 1258                | 21.4% |
| High school, completed                                                         | 1360                | 23.2% |

|                                  |      |       |
|----------------------------------|------|-------|
| GED                              | 725  | 12.3% |
| Some college or higher education | 1442 | 24.6% |
| Unknown                          | 1088 | 18.5% |
| <b>Children</b>                  |      |       |
| 0 Children                       | 1622 | 27.6% |
| 1 Child                          | 998  | 17.0% |
| 2 Children                       | 812  | 13.8% |
| 3+ Children                      | 1272 | 21.7% |
| Unknown                          | 1169 | 19.9% |
| <b>Marital Status</b>            |      |       |
| Married                          | 408  | 6.9%  |
| Single                           | 4399 | 74.9% |
| Unknown                          | 1066 | 18.2% |

---

Counts for people on high-level probation any time during 2016.

Includes people with violation status, but not warrant status.

Minnesota Health Care Plans (MHCP) includes any full or partial month while on high-level probation in 2016. Counts are not exclusive and do not add up to 100 percent.

---

**Table 2.** Participation in social service programs of individuals while on high-level probation in Hennepin County, Minnesota, any time during 2016 and met MHCP enrollment criteria.

|                                               | HC probation cohort |       |
|-----------------------------------------------|---------------------|-------|
|                                               | <i>n</i>            | %     |
| <b>Food Support (SNAP)</b>                    | 3189                | 54.3% |
| <b>Cash Support</b>                           | 2305                | 39.2% |
| General Assistance                            | 1593                | 27.1% |
| Minnesota Family Investment Program<br>(TANF) | 491                 | 8.4%  |
| Other income support                          | 328                 | 5.6%  |
| <b>Group Residential Housing</b>              | 873                 | 14.9% |
| <b>Shelter</b>                                | 398                 | 6.8%  |

Counts for people on high-level probation any time during 2016.

Includes people with violation status, but not warrant status.

Minnesota Health Care Plans (MHCP) includes any full or partial month while on high-level probation in 2016. Counts are not exclusive and do not add up to 100 percent.

**Table 3.** Health conditions of individuals on high-level probation in Hennepin County, Minnesota, any time during 2016 and met MHCP enrollment criteria.

|                                                          | HC probation cohort |       |
|----------------------------------------------------------|---------------------|-------|
|                                                          | <i>n</i>            | %     |
| <b>Cohort</b>                                            | 5873                |       |
| Women of childbearing age who meet prior enroll criteria | 932                 | 11.7% |
| <b>Physical Conditions</b>                               |                     |       |
| Hypertension                                             | 1015                | 17.3% |
| Asthma                                                   | 842                 | 14.3% |
| Arthritis                                                | 513                 | 8.7%  |
| Diabetes                                                 | 346                 | 5.9%  |
| Cancer                                                   | 29                  | 0.5%  |
| Heart Disease                                            | 157                 | 2.7%  |
| Chronic Kidney Disease                                   | 337                 | 5.7%  |
| COPD                                                     | 211                 | 3.6%  |
| Viral Hepatitis                                          | 276                 | 4.7%  |
| <b>Number of Chronic Physical Conditions*</b>            |                     |       |
| 0                                                        | 3815                | 65.0% |
| 1                                                        | 1146                | 19.5% |
| 2+                                                       | 912                 | 15.5% |
| <b>Pregnant in last 12 mos. (% of women)</b>             | 99                  | 10.6% |
| <b>Substance Use Disorders (SUD)</b>                     |                     |       |
| Any SUD                                                  | 3901                | 66.4% |
| Alcohol                                                  | 2417                | 41.2% |
| Cannabis                                                 | 1703                | 29.0% |
| Opioid                                                   | 1074                | 18.3% |
| Methamphetamine                                          | 936                 | 15.9% |
| Cocaine/crack                                            | 852                 | 14.5% |
| Sedatives                                                | 182                 | 3.1%  |
| Unspecified/other SUD                                    | 1732                | 29.5% |
| Two or more SUD                                          | 1957                | 33.3% |
| <b>Mental Health</b>                                     |                     |       |
| Any mental health                                        | 3233                | 55.0% |
| Depression                                               | 2461                | 41.9% |
| Anxiety                                                  | 2517                | 42.9% |
| Bipolar                                                  | 1195                | 20.3% |

|                       |      |       |
|-----------------------|------|-------|
| PTSD                  | 1000 | 17.0% |
| Severe mental illness | 748  | 12.7% |
| <b>SUD + MI</b>       |      |       |
| Any SUD and any MI    | 2635 | 44.9% |

Counts for people on high-level probation any time during 2016 meeting enrollment criteria

Includes people with violation status, but not warrant status

Conditions among those with 6+ months full-benefit public health insurance eligibility in past three years in Minnesota

Conditions from ICD9 diagnosis codes 2013-2015, ICD10 codes 2015-2016. Physical and mental health conditions grouped according to CCW specifications. SUD conditions grouped according to HCUP specifications, excluding remission codes.

\*Chronic physical conditions include hypertension, chronic kidney disease, coronary artery disease, diabetes, cancer, stroke, asthma, arthritis, and chronic obstructive pulmonary disease

**Table 4.** Comparative rates of health conditions of individuals on high-level probation in Hennepin County, Minnesota, any time during 2016 and met MHCP enrollment criteria, versus general population.

|                                      | HC probation cohort,<br>adjusted for age and<br>sex<br>(95% CI)<br><i>n</i> = 5873 | BRFSS comparison,<br>adjusted for age and<br>sex<br>(95% CI) | NSDUH<br>comparison,<br>adjusted for age<br>and sex (95% CI) |
|--------------------------------------|------------------------------------------------------------------------------------|--------------------------------------------------------------|--------------------------------------------------------------|
| <b>Physical Conditions</b>           |                                                                                    |                                                              |                                                              |
| Hypertension                         | 17.0% (16.0% - 18.0%)                                                              | 12.5% (11.4% - 13.6%)                                        |                                                              |
| Asthma                               | 14.5% (13.6% - 15.4%)                                                              | 5.5% (4.9% - 6.1%)                                           |                                                              |
| Arthritis                            | 7.8% (7.0% - 8.5%)†                                                                | 8.2% (7.6% - 8.8%)†                                          |                                                              |
| Diabetes                             | 5.7% (5.1% - 6.4%)                                                                 | 3.2% (2.8% - 3.7%)                                           |                                                              |
| Chronic Kidney Disease               | 5.8% (5.1% - 6.4%)                                                                 | 0.2% (-0.1% - 0.5%)                                          |                                                              |
| COPD                                 | 3.4% (2.9% - 4.0%)                                                                 | 1.2% (0.8% - 1.5%)                                           |                                                              |
| <b>Substance Use Disorders (SUD)</b> |                                                                                    |                                                              |                                                              |



|                       |                    |                |
|-----------------------|--------------------|----------------|
|                       | 66.5% (65.3% -     | 8.1% (7.6% -   |
|                       | 67.7%)             | 8.5%)          |
| Any SUD               | 40.9% (39.7% -     | 6.3% (5.9% -   |
|                       | 42.2%)             | 6.7%)          |
| Alcohol               | 28.3% (27.1% -     | 1.7% (1.5% -   |
|                       | 29.5%)             | 1.8%)          |
| Cannabis              | 17.6% ((16.6% -    | 0.7% (0.6% -   |
|                       | 18.6%)             | 0.8%)          |
| Opioid                | 14.9% (14.0% -     | 0.2% (0.2% -   |
|                       | 15.9%)             | 0.3%)          |
| Methamphetamine       | 13.2% (12.3% -     | 0.2% (0.2% -   |
|                       | 14.1%)             | 0.3%)          |
| Cocaine/crack         |                    | 0.1% (0.0% -   |
|                       |                    | 0.1%)          |
| Sedatives             | 2.9% (2.5% - 3.4%) |                |
| <b>Mental Health</b>  |                    |                |
| Any mental health     | 55.3% (54.0% -     | 14.4% (13.4% - |
| condition             | 56.6%)             | 15.1%)         |
|                       | 41.6% (40.4% -     | 9.4% (8.9% -   |
| Depression            | 42.9%)             | 10%)           |
|                       | 12.5% (11.7% -     | 4.3% (3.9% -   |
| Severe mental illness | 13.4%)             | 4.6%)          |
| <b>SUD + MI</b>       |                    |                |
|                       | 44.7% (43.4% -     | 2.6% (2.3% -   |
| Any SUD and any MI    | 46.0%)             | 2.8%)          |

Counts for people on high-level probation any time during 2016

Includes people with violation status, but not warrant status

Conditions among those with 6+ months full-benefit public health insurance eligibility in past three years in Minnesota

Conditions from ICD9 diagnosis codes 2013-2015, ICD10 codes 2015-2016. Physical and mental health conditions grouped according to CCW specifications. SUD conditions grouped according to HCUP specifications, excluding remission codes.

Adjusted to age and gender distributions for the high-level cohort. Physical condition comparisons use BRFSS 2015-2016 values for Minnesota, SUD and MI conditions use NSDUH values for the U.S.

Based on bivariate statistical testing, all values were significant ( $p < .0001$ ) with the exception of those marked with †, which were not significantly different

1  
2  
3  
4  
5  
6  
7  
8  
9  
10  
11  
12  
13  
14  
15  
16  
17  
18  
19  
20  
21  
22  
23  
24  
25  
26  
27  
28  
29  
30  
31  
32  
33  
34  
35  
36  
37  
38  
39  
40  
41  
42  
43  
44  
45  
46  
47  
48  
49  
50  
51  
52  
53  
54  
55  
56  
57  
58  
59  
60

For peer review only

**Table 5.** Health conditions of individuals on high-level probation in Hennepin County, Minnesota, any time during 2016 and met MHCP enrollment criteria, by race and ethnicity

|                                                 | HC probation cohort             |                                       |                            |                                      |                          |
|-------------------------------------------------|---------------------------------|---------------------------------------|----------------------------|--------------------------------------|--------------------------|
|                                                 | White, non-Hispanic<br>(N=2055) | Black or African<br>American (N=3103) | Native American<br>(N=324) | Asian or Pacific<br>Islander (N=114) | Hispanic<br>(N=212)      |
| <b>Physical Conditions</b>                      | %                               | %                                     | %                          | %                                    | %                        |
| Asthma                                          | 10.8% (9.5% - 12.2%)            | 17.4%*** (16.1% - 18.8%)              | 12.9% (9.5% - 16.4%)       | 11.0% (5.2% - 16.9%)                 | 12.9% (8.4% - 17.5%)     |
| Diabetes                                        | 4.2% (3.4% - 5.0%)              | 6.8%*** (5.9% - 7.7%)                 | 10.2%*** (7.0% - 13.4%)    | 3.9% (0.2% - 7.5%)                   | 8.4% (4.3% - 12.5%)      |
| Hypertension                                    | 13.7% (12.4% - 15.0%)           | 20.5%*** (19.1% - 21.8%)              | 20.1%** (16.2% - 24.1%)    | 9.8% (4.4% - 15.1%)                  | 16.2% (11.1% - 21.3%)    |
| Arthritis                                       | 7.2% (6.2% - 8.1%)              | 10.2%*** (9.1% - 11.2%)               | 12.4%** (9.1% - 15.7%)     | 2.1%** (-0.7% - 4.9%)                | 5.9% (2.2% - 9.6%)       |
| CKD                                             | 5.2% (4.3% - 6.1%)              | 6.0% (5.1% - 6.8%)                    | 7.7% (4.8% - 10.6%)        | 5.4% (1.2% - 9.5%)                   | 5.5% (2.2% - 8.8%)       |
| COPD                                            | 3.7% (2.9% - 4.4%)              | 3.7% (3.0% - 4.4%)                    | 3.4% (1.4% - 5.3%)         | 2.8% (-0.3% - 5.9%)                  | 2.5% (0.1% - 4.9%)       |
| Viral Hepatitis                                 | 6.1% (5.1% - 7.0%)              | 3.1%*** (2.5% - 3.8%)                 | 10.1%* (6.9% - 13.3%)      | 0.9%*** (-0.8% - 2.6%)               | 5.7% (2.3% - 9.1%)       |
| IHD                                             | 2.6%*** (1.9% - 3.2%)           | 2.8%*** (2.2% - 3.3%)                 | 2.7%** (0.9% - 4.6%)       | 2.8% (-0.3% - 5.9%)                  | 3.8%* (0.9% - 6.7%)      |
| Cancer                                          | 0.3%** (0.1% - 0.5%)            | 0.7%*** (0.4% - 1.0%)                 | 0.7% (-0.2% - 1.6%)        | -                                    | 0.5% (-0.5% - 1.5%)      |
| Average # of chronic physical conditions (0-9)* | 0.52 (0.48 - 0.55)              | 0.73 (0.69 - 0.76)***                 | 0.75 (0.63 - 0.87)***      | 0.42 (0.25 - 0.59)                   | 0.56 (0.41 - 0.71)       |
| <b>Substance use disorders</b>                  |                                 |                                       |                            |                                      |                          |
| Any SUD                                         | 71.6% (69.7% - 73.6%)           | 62.0%*** (60.3% - 63.7%)              | 85.9%*** (82.0% - 89.7%)   | 47.7%*** (38.6% - 56.8%)             | 66.3% (60.1% - 72.5%)    |
| Alcohol                                         | 43.3% (41.2% - 45.4%)           | 38.5%** (36.8% - 40.2%)               | 59.2%*** (53.9% - 64.4%)   | 24.8%*** (17.0% - 32.7%)             | 42.5% (35.9% - 49.1%)    |
| Cannabis                                        | 27.3% (25.3% - 29.2%)           | 30.7%** (29.1% - 32.3%)               | 35.8%** (30.6% - 40.9%)    | 8.8%*** (3.6% - 13.9%)               | 21.5%* (16.2% - 26.9%)   |
| Cocaine                                         | 10.1% (8.9% - 11.3%)            | 17.6%*** (16.2% - 18.9%)              | 20.5%*** (16.3% - 24.7%)   | 5.6%* (1.3% - 9.9%)                  | 16.4%* (11.2% - 21.5%)   |
| Methampheta                                     |                                 |                                       |                            |                                      |                          |
| mine                                            | 29.1% (27.1% - 31.1%)           | 5.5%*** (4.7% - 6.3%)                 | 27.9% (23.1% - 32.7%)      | 17.4%** (10.6% - 24.3%)              | 15.0%*** (10.2% - 19.8%) |
| Opioids                                         | 24.8% (22.9% - 26.6%)           | 41.2%*** (35.9% - 46.5%)              | 46.5%                      | 7.2%*** (2.4% - 12.0%)               | 23.5% (17.7% - 29.2%)    |
| Sedatives                                       | 5.8% (4.8% - 6.9%)              | 11.5%*** (10.3% - 12.6)               | 3.9% (1.9% - 5.9%)         | 1.8%** (-0.7% - 4.2%)                | 6.4% (3.1% - 9.6%)       |
| Unspecified                                     |                                 | 24.8%*** (23.3% - 26.4%)              | 41.7%* (36.4% - 47.1%)     | 17.1%*** (10.2% - 24.0%)             | 23.4%*** (17.7% - 29.2%) |
| SUD                                             | 35.6% (33.6% - 37.7%)           | 26.4%                                 | 47.1%                      | 24.0%                                | 29.2%                    |
| <b>Mental Health</b>                            |                                 |                                       |                            |                                      |                          |
| Any MI                                          | 64.9% (62.8% - 66.9%)           | 48.5%*** (46.8% - 50.3%)              | 67.5% (62.3% - 72.6%)      | 34.6%*** (26.1% - 43.1%)             | 52.8%** (46.3% - 59.3%)  |

|                         |                       |                       |                          |                          |                          |                         |
|-------------------------|-----------------------|-----------------------|--------------------------|--------------------------|--------------------------|-------------------------|
|                         |                       |                       | 35.4%*** (33.7% - 37.0%) | 55.1% (49.7% - 60.6%)    | 28.3%*** (20.1% - 36.4%) | 44.0%* (37.5% - 50.6%)  |
| Anxiety                 | 53.0% (50.9% - 55.1%) |                       | 18.6%*** (17.2% - 20.0%) | 19.4% (15.3% - 23.5%)    | 10.9%*** (5.2% - 16.7%)  | 20.2% (14.7% - 25.6%)   |
| Bipolar                 | 23.5% (21.7% - 25.3%) |                       | 36.8%*** (35.2% - 38.5%) | 51.4% (46.0% - 56.7%)    | 24.0%*** (16.3% - 31.7%) | 42.3% (35.9% - 48.7%)   |
| Depression              | 49.0% (46.9% - 51.1%) |                       |                          | 22.2%* (17.9% - 26.4%)   | 9.1%** (3.8% - 14.4%)    | 17.6% (12.4% - 22.7%)   |
| PTSD                    | 17.3% (15.7% - 18.8%) | 16.6% (15.3% - 17.9%) |                          | 16.6%* (12.6% - 20.7%)   | 9.8% (4.3% - 15.2%)      | 10.9% (6.5% - 15.2%)    |
| Severe mental illness   | 11.2% (9.9% - 12.6%)  |                       | 13.6%* (12.4% - 14.9%)   | 20.7%                    |                          |                         |
| <b>SUD + MI</b>         |                       |                       |                          |                          |                          |                         |
| Any SUD and any MI      | 53.2% (51.1% - 55.3%) |                       | 38.5%*** (36.8% - 40.1%) | 63.9%*** (58.7% - 69.2%) | 21.8%*** (14.3% - 29.4%) | 42.9%** (36.3% - 49.4%) |
| <b>Other conditions</b> |                       |                       |                          |                          |                          |                         |
| Personality disorders   | 15.4% (13.9% - 16.9%) |                       | 10.0%*** (8.9% - 11.0%)  | 11.0%* (7.8% - 14.3%)    | 7.3%** (2.5% - 12.2%)    | 13.0% (8.3% - 17.7%)    |

Race and ethnicity designations from data maintained by Hennepin County Corrections

\*  $p < .05$  in bivariate comparison with White, Non-Hispanic

\*\*  $p < .01$  in bivariate comparison with White, Non-Hispanic

\*\*\*  $p < .001$  in bivariate comparison with White, Non-Hispanic

**REFERENCES**

1. Kaeble D. Probation and Parole in the United States, 2017-2018. Bureau of Justice Statistics; 2020. Available from: <https://www.bjs.gov/content/pub/pdf/ppus1718.pdf>
2. Zeng Z. Jail Inmates in 2018. Bureau of Justice Statistics; 2020. Available from: <https://www.bjs.gov/content/pub/pdf/ji18.pdf>
3. Carson EA. Prisoners in 2018. Bureau of Justice Statistics; 2020. Available from: <https://www.bjs.gov/content/pub/pdf/p18.pdf>
4. Phelps MS. Mass probation: Toward a more robust theory of state variation in punishment. *Punishm Soc.* 2017;19(1):53-73.
5. Hawks L, Wang EA, Howell B, Woolhandler S, Himmelstein DU, Bor D, et al. Health Status and Health Care Utilization of US Adults Under Probation: 2015-2018. *Am J Public Health.* 2020;110(9):1411-7.
6. Winkelman TNA, Phelps MS, Mitchell KL, Jennings L, Shlafer RJ. Physical Health and Disability Among U.S. Adults Recently on Community Supervision. *J Correct Health Care.* 2020;26(2):129-37.
7. Wildeman C, Goldman AW, Wang EA. Age-Standardized Mortality of Persons on Probation, in Jail, or in State Prison and the General Population, 2001-2012. *Public Health Reports.* 2019;134(6):660-6.
8. Patel K, Boutwell A, Brockmann BW, Rich JD. Integrating correctional and community health care for formerly incarcerated people who are eligible for Medicaid. *Health Aff (Millwood).* 2014;33(3):468-73.
9. *Estelle v Gamble*, 429 US 97 (1976).

- 1  
2  
3 10. Social Security Act Amendments of 1965, Pub L No. 97, 42 USC §1396d (April 9,  
4  
5 1965).  
6  
7
- 8 11. Pickens CM, Pierannunzi C, Garvin W, Town M. Surveillance for Certain Health  
9  
10 Behaviors and Conditions Among States and Selected Local Areas — Behavioral Risk  
11  
12 Factor Surveillance System, United States, 2015. *MMWR Surveillance Summaries*.  
13  
14 2018;67(9):1-90.  
15
- 16  
17 12. Center for Behavioral Health Statistics and Quality. (2018). *2015 National Survey on*  
18  
19 *Drug Use and Health: Public use file codebook*. Substance Abuse and Mental Health  
20  
21 Services Administration. [https://samhda.s3-us-gov-west-1.amazonaws.com/s3fs-](https://samhda.s3-us-gov-west-1.amazonaws.com/s3fs-public/field-uploads-protected/studies/NSDUH-2015/NSDUH-2015-datasets/NSDUH-2015DS0001/NSDUH-2015-DS0001-info/NSDUH-2015-DS0001-info-codebook.pdf)  
22  
23 [public/field-uploads-protected/studies/NSDUH-2015/NSDUH-2015-datasets/NSDUH-](https://samhda.s3-us-gov-west-1.amazonaws.com/s3fs-public/field-uploads-protected/studies/NSDUH-2015/NSDUH-2015-datasets/NSDUH-2015DS0001/NSDUH-2015-DS0001-info/NSDUH-2015-DS0001-info-codebook.pdf)  
24  
25 [2015DS0001/NSDUH-2015-DS0001-info/NSDUH-2015-DS0001-info-codebook.pdf](https://samhda.s3-us-gov-west-1.amazonaws.com/s3fs-public/field-uploads-protected/studies/NSDUH-2015/NSDUH-2015-datasets/NSDUH-2015DS0001/NSDUH-2015-DS0001-info/NSDUH-2015-DS0001-info-codebook.pdf)  
26  
27
- 28  
29 13. Center for Behavioral Health Statistics and Quality. (2018). *2016 National Survey on*  
30  
31 *Drug Use and Health: Public use file codebook*. Substance Abuse and Mental Health  
32  
33 Services Administration. [http://samhda.s3- us-gov-west-1.amazonaws.com/s3fs-](http://samhda.s3-us-gov-west-1.amazonaws.com/s3fs-public/field-uploads-protected/studies/NSDUH-2016/NSDUH-2016-datasets/NSDUH-2016-DS0001/NSDUH-2016-DS0001-info/NSDUH-2016-DS0001-info-codebook.pdf)  
34  
35 [public/field-uploads-protected/studies/NSDUH-2016/NSDUH-2016- datasets/NSDUH-](http://samhda.s3-us-gov-west-1.amazonaws.com/s3fs-public/field-uploads-protected/studies/NSDUH-2016/NSDUH-2016-datasets/NSDUH-2016-DS0001/NSDUH-2016-DS0001-info/NSDUH-2016-DS0001-info-codebook.pdf)  
36  
37 [2016-DS0001/NSDUH-2016-DS0001-info/NSDUH-2016-DS0001-info-codebook.pdf](http://samhda.s3-us-gov-west-1.amazonaws.com/s3fs-public/field-uploads-protected/studies/NSDUH-2016/NSDUH-2016-datasets/NSDUH-2016-DS0001/NSDUH-2016-DS0001-info/NSDUH-2016-DS0001-info-codebook.pdf)  
38  
39
- 40  
41 14. Center for Medicare & Medicaid Services. Condition Categories. Chronic Conditions  
42  
43 Data Warehouse website. Accessed October 20, 2020.  
44  
45 <https://www2.ccwdata.org/web/guest/condition-categories>  
46
- 47  
48 15. Heslin KC, Elixhauser A. Mental and Substance Use Disorders Among Hospitalized  
49  
50 Teenagers, 2012. Agency for Healthcare Research and Quality.17.  
51
- 52  
53 16. Owens PL, McDermott KW, Heslin KC. Inpatient Stays Involving Mental and Substance  
54  
55 Use Disorders, 2016. Agency for Healthcare Research and Quality.20.  
56  
57  
58  
59  
60

- 1  
2  
3 17. Larney S, Zaller ND, Dumont DM, Willcock A, Degenhardt L. A systematic review and  
4 meta-analysis of racial and ethnic disparities in hepatitis C antibody prevalence in United  
5 States correctional populations. *Ann Epidemiol.* 2016;26(8):570-8.e2.  
6  
7  
8  
9  
10 18. Nowotny KM, Rogers RG, Boardman JD. Racial disparities in health conditions among  
11 prisoners compared with the general population. *SSM Popul Health.* 2017;3:487-96.  
12  
13  
14 19. Bronson J, Berzofsky M. Indicators of Mental Health Problems Reported by Prisoners  
15 and Jail Inmates, 2011-12. Bureau of Justice Statistics; 2017. Available from:  
16  
17 <https://www.bjs.gov/content/pub/pdf/imhprpji1112.pdf>  
18  
19  
20  
21 20. James D, Glaze L. Mental Health Problems of Prison. Bureau of Justice Statistics; 2006.  
22  
23  
24 21. Kaba F, Solimo A, Graves J, Glowa-Kollisch S, Vise A, MacDonald R, et al. Disparities  
25 in Mental Health Referral and Diagnosis in the New York City Jail Mental Health  
26 Service. *Am J Public Health.* 2015;105(9):1911-6.  
27  
28  
29  
30  
31  
32  
33  
34  
35  
36  
37  
38  
39  
40  
41  
42  
43  
44  
45  
46  
47  
48  
49  
50  
51  
52  
53  
54  
55  
56  
57  
58  
59  
60

**Supplemental 1.** Demographics and public health insurance prevalence of individuals on high-level probation in Hennepin County, Minnesota, any time during 2016 and met MHCP enrollment criteria by race and ethnicity.

| Cohort                                                                     | HC probation cohort |       |                           |       |                 |       |                           |       |          |       |
|----------------------------------------------------------------------------|---------------------|-------|---------------------------|-------|-----------------|-------|---------------------------|-------|----------|-------|
|                                                                            | White, non-Hispanic |       | Black or African American |       | Native American |       | Asian or Pacific Islander |       | Hispanic |       |
|                                                                            | n                   | %     | n                         | %     | n               | %     | n                         | %     | n        | %     |
| High-level probation meeting enroll criteria                               | 2055                | 35.0% | 3104                      | 52.9% | 324             | 5.5%  | 114                       | 1.9%  | 212      | 3.6%  |
| Median age                                                                 | 35.4                |       | 31.5                      |       | 32.7            |       | 32.3                      |       | 29.2     |       |
| Average age                                                                | 37.7                |       | 34.4                      |       | 34.7            |       | 35.2                      |       | 32.6     |       |
| Male                                                                       | 1580                | 76.9% | 2629                      | 84.7% | 201             | 62.0% | 97                        | 85.1% | 175      | 82.5% |
| <b>Health Insurance Enrollment (While on High-Level Probation in 2016)</b> |                     |       |                           |       |                 |       |                           |       |          |       |
| Any MHCP                                                                   | 1821                | 88.6% | 2670                      | 86.0% | 292             | 90.1% | 95                        | 83.3% | 188      | 88.7% |
| Consolidated treatment fund                                                | 466                 | 22.7% | 666                       | 21.5% | 129             | 39.8% | 24                        | 21.1% | 55       | 25.9% |
| Any full-benefit MHCP                                                      | 1769                | 86.1% | 2558                      | 82.4% | 282             | 87.0% | 92                        | 80.7% | 181      | 85.4% |
| Medicaid                                                                   | 1676                | 81.6% | 2487                      | 80.1% | 279             | 86.1% | 87                        | 76.3% | 167      | 78.8% |
| MinnesotaCare                                                              | 141                 | 6.9%  | 97                        | 3.1%  | --              | --    | --                        | --    | 18       | 8.5%  |
| <b>Medicaid Eligibility Types</b>                                          |                     |       |                           |       |                 |       |                           |       |          |       |
| Expansion                                                                  | 1218                | 72.7% | 1524                      | 61.3% | 191             | 68.5% | 54                        | 62.1% | 116      | 69.5% |
| Disability, no Medicare/SS                                                 | 107                 | 6.4%  | 323                       | 13.0% | 23              | 8.2%  | --                        | --    | --       | --    |
| Disability, with Medicare/SS                                               | 129                 | 7.7%  | 177                       | 7.1%  | --              | --    | --                        | --    | --       | --    |
| Parent                                                                     | 247                 | 14.7% | 441                       | 17.7% | 50              | 17.9% | 28                        | 32.2% | 29       | 17.4% |
| Other                                                                      | 70                  | 4.2%  | 204                       | 8.2%  | 17              | 6.1%  | --                        | --    | --       | --    |
| <b>Employment</b>                                                          |                     |       |                           |       |                 |       |                           |       |          |       |
| Part-time                                                                  | 363                 | 17.7% | 574                       | 18.5% | 28              | 8.6%  | 22                        | 19.3% | 39       | 18.4% |
| Full-time                                                                  | 539                 | 26.2% | 675                       | 21.7% | 31              | 9.6%  | 27                        | 23.7% | 55       | 25.9% |
| Unemployed                                                                 | 685                 | 33.3% | 1251                      | 40.3% | 184             | 56.8% | 35                        | 30.7% | 70       | 33.0% |
| Other                                                                      | 49                  | 2.4%  | 68                        | 2.2%  | --              | --    | --                        | --    | --       | --    |
| Unknown                                                                    | 419                 | 20.4% | 536                       | 17.3% | --              | --    | --                        | --    | --       | --    |
| <b>Education</b>                                                           |                     |       |                           |       |                 |       |                           |       |          |       |
| High school, not completed                                                 | 259                 | 12.6% | 792                       | 25.5% | 112             | 34.6% | --                        | --    | 57       | 26.9% |
| High school, completed                                                     | 439                 | 21.4% | 759                       | 24.5% | 66              | 20.4% | 29                        | 25.4% | 49       | 23.1% |
| GED                                                                        | 247                 | 12.0% | 403                       | 13.0% | 48              | 14.8% | --                        | --    | 17       | 8.0%  |
| Some college or higher education                                           | 631                 | 30.7% | 688                       | 22.2% | 36              | 11.1% | 12                        | 10.5% | 33       | 15.6% |
| Unknown                                                                    | 479                 | 23.3% | 462                       | 14.9% | 52              | 16.0% | 28                        | 24.6% | 45       | 21.2% |
| <b>Children</b>                                                            |                     |       |                           |       |                 |       |                           |       |          |       |
| 0 Children                                                                 | 703                 | 34.2% | 729                       | 23.5% | 75              | 23.1% | 38                        | 33.3% | 66       | 31.1% |
| 1 Child                                                                    | 330                 | 16.1% | 564                       | 18.2% | 61              | 18.8% | --                        | --    | 25       | 11.8% |
| 2 Children                                                                 | 238                 | 11.6% | 470                       | 15.1% | 52              | 16.0% | --                        | --    | 31       | 14.6% |
| 3+ Children                                                                | 264                 | 12.8% | 859                       | 27.7% | 84              | 25.9% | --                        | --    | 36       | 17.0% |
| Unknown                                                                    | 520                 | 25.3% | 482                       | 15.5% | 52              | 16.0% | 32                        | 28.1% | 46       | 21.7% |
| <b>Marital Status</b>                                                      |                     |       |                           |       |                 |       |                           |       |          |       |
| Married                                                                    | 157                 | 7.6%  | 197                       | 6.3%  | 14              | 4.3%  | --                        | --    | 17       | 8.0%  |
| Single                                                                     | 1473                | 71.7% | 2415                      | 77.8% | 252             | 77.8% | --                        | --    | 156      | 73.6% |
| Unknown                                                                    | 425                 | 20.7% | 492                       | 15.9% | 58              | 17.9% | 30                        | 26.3% | 39       | 18.4% |

Counts for people on high-level probation any time during 2016.

Includes people with violation status, but not warrant status.

Minnesota Health Care Plans (MHCP) includes any full or partial month while on high-level probation in 2016. Counts are not exclusive and do not add up to 100 percent.



**STROBE 2007 (v4) Statement—Checklist of items that should be included in reports of *cross-sectional studies***

| Section/Topic            | Item # | Recommendation                                                                                                                                                                       | Reported on page #                              |
|--------------------------|--------|--------------------------------------------------------------------------------------------------------------------------------------------------------------------------------------|-------------------------------------------------|
| Title and abstract       | 1      | (a) Indicate the study's design with a commonly used term in the title or the abstract                                                                                               | Title. <b>Page 1.</b>                           |
|                          |        | (b) Provide in the abstract an informative and balanced summary of what was done and what was found                                                                                  | Abstract, Methods and Findings. <b>Page 2.</b>  |
| <b>Introduction</b>      |        |                                                                                                                                                                                      |                                                 |
| Background/rationale     | 2      | Explain the scientific background and rationale for the investigation being reported                                                                                                 | Introduction, paragraphs 1-3. <b>Pages 4-5.</b> |
| Objectives               | 3      | State specific objectives, including any prespecified hypotheses                                                                                                                     | Introduction, paragraph 4. <b>Page 5.</b>       |
| <b>Methods</b>           |        |                                                                                                                                                                                      |                                                 |
| Study design             | 4      | Present key elements of study design early in the paper                                                                                                                              | Methods, paragraphs 1-3. <b>Pages 5-7.</b>      |
| Setting                  | 5      | Describe the setting, locations, and relevant dates, including periods of recruitment, exposure, follow-up, and data collection                                                      | Methods, paragraphs 1-3. <b>Pages 5-7.</b>      |
| Participants             | 6      | (a) Give the eligibility criteria, and the sources and methods of selection of participants                                                                                          | Methods, paragraphs 1-2. <b>Pages 5-6.</b>      |
| Variables                | 7      | Clearly define all outcomes, exposures, predictors, potential confounders, and effect modifiers. Give diagnostic criteria, if applicable                                             | Methods, paragraphs 5-7. <b>Pages 7-8</b>       |
| Data sources/measurement | 8*     | For each variable of interest, give sources of data and details of methods of assessment (measurement). Describe comparability of assessment methods if there is more than one group | Methods, paragraphs 3 and 5. <b>Pages 7-8.</b>  |
| Bias                     | 9      | Describe any efforts to address potential sources of bias                                                                                                                            | Methods,                                        |

|                        |     |                                                                                                                                                                                                   |                                                                                                                   |
|------------------------|-----|---------------------------------------------------------------------------------------------------------------------------------------------------------------------------------------------------|-------------------------------------------------------------------------------------------------------------------|
|                        |     |                                                                                                                                                                                                   | paragraphs 10-11.<br><b>Pages 9-10.</b>                                                                           |
| Study size             | 10  | Explain how the study size was arrived at                                                                                                                                                         | Methods, paragraph 1. <b>Page 5.</b>                                                                              |
| Quantitative variables | 11  | Explain how quantitative variables were handled in the analyses. If applicable, describe which groupings were chosen and why                                                                      | Methods, paragraphs 5-7.<br><b>Pages 7-8.</b>                                                                     |
| Statistical methods    | 12  | (a) Describe all statistical methods, including those used to control for confounding                                                                                                             | Methods, paragraphs 8-11.<br><b>Pages 9-10.</b>                                                                   |
|                        |     | (b) Describe any methods used to examine subgroups and interactions                                                                                                                               | Methods, paragraph 10. <b>Pages 9.</b>                                                                            |
|                        |     | (c) Explain how missing data were addressed                                                                                                                                                       | Methods, paragraph 10. <b>Page 9.</b>                                                                             |
|                        |     | (d) If applicable, describe analytical methods taking account of sampling strategy                                                                                                                | N/A                                                                                                               |
|                        |     | (e) Describe any sensitivity analyses                                                                                                                                                             | N/A                                                                                                               |
| <b>Results</b>         |     |                                                                                                                                                                                                   |                                                                                                                   |
| Participants           | 13* | (a) Report numbers of individuals at each stage of study—eg numbers potentially eligible, examined for eligibility, confirmed eligible, included in the study, completing follow-up, and analysed | Results, paragraph 1. <b>Page 10.</b>                                                                             |
|                        |     | (b) Give reasons for non-participation at each stage                                                                                                                                              | Methods, paragraph 1. <b>Page 5.</b>                                                                              |
|                        |     | (c) Consider use of a flow diagram                                                                                                                                                                | N/A                                                                                                               |
| Descriptive data       | 14* | (a) Give characteristics of study participants (eg demographic, clinical, social) and information on exposures and potential confounders                                                          | Results, paragraph 1<br>Table 1. <b>Page 10.</b>                                                                  |
|                        |     | (b) Indicate number of participants with missing data for each variable of interest                                                                                                               | Some sociodemographic variables had missing data, 'unknown' noted in Table 1. <b>Page 17.</b><br>N/A for adjusted |

|                   |     |                                                                                                                                                                                                              |                                                                                                                                                          |
|-------------------|-----|--------------------------------------------------------------------------------------------------------------------------------------------------------------------------------------------------------------|----------------------------------------------------------------------------------------------------------------------------------------------------------|
|                   |     |                                                                                                                                                                                                              | analyses.                                                                                                                                                |
| Outcome data      | 15* | Report numbers of outcome events or summary measures                                                                                                                                                         | Probation group:<br>Results, paragraph 3;<br>Table 3. <b>Pages 10, 19.</b><br>Comparison group:<br>Results, paragraph 4-5; Table 4. <b>Pages 11, 20.</b> |
| Main results      | 16  | (a) Give unadjusted estimates and, if applicable, confounder-adjusted estimates and their precision (eg, 95% confidence interval). Make clear which confounders were adjusted for and why they were included | Methods, paragraph 10; Results, paragraph 3-4, Table 3, Table 4. <b>Pages 9-11, 19-20.</b>                                                               |
|                   |     | (b) Report category boundaries when continuous variables were categorized                                                                                                                                    | N/A                                                                                                                                                      |
|                   |     | (c) If relevant, consider translating estimates of relative risk into absolute risk for a meaningful time period                                                                                             | N/A                                                                                                                                                      |
| Other analyses    | 17  | Report other analyses done—eg analyses of subgroups and interactions, and sensitivity analyses                                                                                                               | Results, paragraph 6. <b>Page 12.</b>                                                                                                                    |
| <b>Discussion</b> |     |                                                                                                                                                                                                              |                                                                                                                                                          |
| Key results       | 18  | Summarise key results with reference to study objectives                                                                                                                                                     | Discussion, paragraph 1. <b>Page 12.</b>                                                                                                                 |
| Limitations       | 19  | Discuss limitations of the study, taking into account sources of potential bias or imprecision. Discuss both direction and magnitude of any potential bias                                                   | Discussion, paragraph 4. <b>Pages 14-15.</b>                                                                                                             |
| Interpretation    | 20  | Give a cautious overall interpretation of results considering objectives, limitations, multiplicity of analyses, results from similar studies, and other relevant evidence                                   | Discussion, paragraphs 2-3. <b>Pages 13-14.</b>                                                                                                          |
| Generalisability  | 21  | Discuss the generalisability (external validity) of the study results                                                                                                                                        | Discussion, paragraph 4. <b>Pages 14-15.</b>                                                                                                             |

|                          |    |                                                                                                                                                               |                                       |
|--------------------------|----|---------------------------------------------------------------------------------------------------------------------------------------------------------------|---------------------------------------|
| <b>Other information</b> |    |                                                                                                                                                               |                                       |
| Funding                  | 22 | Give the source of funding and the role of the funders for the present study and, if applicable, for the original study on which the present article is based | Funding, paragraph 1. <b>Page 15.</b> |

\*Give information separately for cases and controls in case-control studies and, if applicable, for exposed and unexposed groups in cohort and cross-sectional studies.

**Note:** An Explanation and Elaboration article discusses each checklist item and gives methodological background and published examples of transparent reporting. The STROBE checklist is best used in conjunction with this article (freely available on the Web sites of PLoS Medicine at <http://www.plosmedicine.org/>, Annals of Internal Medicine at <http://www.annals.org/>, and Epidemiology at <http://www.epidem.com/>). Information on the STROBE Initiative is available at [www.strobe-statement.org](http://www.strobe-statement.org).

# BMJ Open

## Health profiles and racial disparities among individuals on probation in Hennepin County, 2016: a cross-sectional study

|                                 |                                                                                                                                                                                                                                                                                                                                                                                                                                                                                                                                                                                                          |
|---------------------------------|----------------------------------------------------------------------------------------------------------------------------------------------------------------------------------------------------------------------------------------------------------------------------------------------------------------------------------------------------------------------------------------------------------------------------------------------------------------------------------------------------------------------------------------------------------------------------------------------------------|
| Journal:                        | <i>BMJ Open</i>                                                                                                                                                                                                                                                                                                                                                                                                                                                                                                                                                                                          |
| Manuscript ID                   | bmjopen-2020-047930.R1                                                                                                                                                                                                                                                                                                                                                                                                                                                                                                                                                                                   |
| Article Type:                   | Original research                                                                                                                                                                                                                                                                                                                                                                                                                                                                                                                                                                                        |
| Date Submitted by the Author:   | 11-May-2021                                                                                                                                                                                                                                                                                                                                                                                                                                                                                                                                                                                              |
| Complete List of Authors:       | Olson, Marin; University of Minnesota Medical School Twin Cities, Schlafer, Rebecca J.; University of Minnesota in Minneapolis, Department of Pediatrics<br>Bodurtha, Peter; Hennepin Healthcare Research Institute, Virtual Data Warehouse<br>Watkins, Jonathan; Hennepin County Center of Innovation and Excellence<br>Hougham, Courtney; Hennepin County, Department of Community Corrections and Rehabilitation<br>Winkelman, Tyler N.A.; Hennepin County Medical Center, Division of General Internal Medicine; Minneapolis Medical Research Foundation, Center for Patient and Provider Experience |
| <b>Primary Subject Heading</b>: | Public health                                                                                                                                                                                                                                                                                                                                                                                                                                                                                                                                                                                            |
| Secondary Subject Heading:      | Health policy, Health services research                                                                                                                                                                                                                                                                                                                                                                                                                                                                                                                                                                  |
| Keywords:                       | PUBLIC HEALTH, Health policy < HEALTH SERVICES ADMINISTRATION & MANAGEMENT, EPIDEMIOLOGY                                                                                                                                                                                                                                                                                                                                                                                                                                                                                                                 |
|                                 |                                                                                                                                                                                                                                                                                                                                                                                                                                                                                                                                                                                                          |

SCHOLARONE™  
Manuscripts



I, the Submitting Author has the right to grant and does grant on behalf of all authors of the Work (as defined in the below author licence), an exclusive licence and/or a non-exclusive licence for contributions from authors who are: i) UK Crown employees; ii) where BMJ has agreed a CC-BY licence shall apply, and/or iii) in accordance with the terms applicable for US Federal Government officers or employees acting as part of their official duties; on a worldwide, perpetual, irrevocable, royalty-free basis to BMJ Publishing Group Ltd ("BMJ") its licensees and where the relevant Journal is co-owned by BMJ to the co-owners of the Journal, to publish the Work in this journal and any other BMJ products and to exploit all rights, as set out in our [licence](#).

The Submitting Author accepts and understands that any supply made under these terms is made by BMJ to the Submitting Author unless you are acting as an employee on behalf of your employer or a postgraduate student of an affiliated institution which is paying any applicable article publishing charge ("APC") for Open Access articles. Where the Submitting Author wishes to make the Work available on an Open Access basis (and intends to pay the relevant APC), the terms of reuse of such Open Access shall be governed by a Creative Commons licence – details of these licences and which [Creative Commons](#) licence will apply to this Work are set out in our licence referred to above.

Other than as permitted in any relevant BMJ Author's Self Archiving Policies, I confirm this Work has not been accepted for publication elsewhere, is not being considered for publication elsewhere and does not duplicate material already published. I confirm all authors consent to publication of this Work and authorise the granting of this licence.

1  
2  
3 **Health profiles and racial disparities among individuals on probation in Hennepin County,**  
4 **2016: a cross-sectional study**  
5  
6  
7

8 *Marin Olson,<sup>1</sup> Rebecca J. Shlafer,<sup>2</sup> Peter Bodurtha,<sup>3</sup> Jonathan Watkins<sup>4</sup>, Courtney Hougham<sup>5</sup>,*  
9 *Tyler N.A. Winkelman<sup>6,7</sup>*  
10  
11

12  
13 <sup>1</sup>*University of Minnesota Medical School, Minneapolis, MN*  
14

15 <sup>2</sup>*Department of Pediatrics, University of Minnesota Medical School, Minneapolis, MN*  
16

17 <sup>3</sup>*Virtual Data Warehouse, Hennepin Healthcare Research Institute, Minneapolis, MN*  
18

19 <sup>4</sup>*Hennepin County Center of Innovation and Excellence, Minneapolis, MN*  
20

21 <sup>5</sup>*Department of Community Corrections and Rehabilitation, Hennepin County, Minneapolis, MN*  
22

23 <sup>6</sup>*Health, Homelessness, and Criminal Justice Lab, Hennepin Healthcare Research Institute,*  
24 *Minneapolis, MN*  
25

26 <sup>7</sup>*General Internal Medicine, Department of Medicine, Hennepin Healthcare, Minneapolis, MN*  
27  
28

29 **Word count:** 3,113  
30

31 **Abstract word count:** 250/250  
32

33 **References:** 25  
34

35 **Figures:** 4 tables, 1 supplemental table  
36  
37

38 **Corresponding Author:** *Tyler N.A. Winkelman, MD, MSc, Division of General Internal*  
39 *Medicine, Department of Medicine, Hennepin Healthcare, 701 Park Ave, Ste S2.309,*  
40 *Minneapolis, MN 55415 (tyler.winkelman@hcmcd.org).*  
41  
42  
43  
44  
45  
46  
47  
48  
49  
50  
51  
52  
53  
54  
55  
56  
57  
58  
59  
60

## ABSTRACT

**Objectives:** To estimate the health characteristics and racial/ethnic health disparities among a probation cohort in Hennepin County. We hypothesized the probation population would have higher health needs compared to the general population as well as significant racial/ethnic health disparities.

**Design:** Cross-sectional study using linked administrative records.

**Participants:** Of 7,992 eligible individuals, 5,873 met inclusion criteria including six or more months of eligibility for full-benefit Minnesota health care plan.

**Setting:** Probation system in Hennepin County in 2016.

**Outcomes:** We compared health condition prevalence among our probation cohort to survey data from the general population and analyzed by race/ethnicity. We also measured sociodemographic characteristics, including the use of safety-net services.

**Results:** Individuals were predominantly male (80.5%), young (mean age: 35.5), and disproportionately Black or African American (52.9%). A majority of individuals enrolled in Medicaid were eligible via Medicaid expansion (65.9%). Compared with the general population, individuals on probation had higher rates of substance use disorders (66.5% vs 8.1%), mental illness (55.3% vs 14.4%), and many physical conditions (e.g. asthma: 17.0% vs 12.5%, chronic kidney disease: 5.8% vs 0.2%). White individuals on probation were significantly more likely than Black or African American individuals to have a diagnosed substance use disorder (71.6% vs 62.0%) or mental health disorder (64.9% vs 48.5%), but fewer chronic physical health conditions (average: 0.52 vs 0.73 chronic physical conditions).



1  
2  
3 **Conclusions:** Individuals on probation have high health needs, which vary substantially by  
4 race/ethnicity. Without attention to this variation, interventions to address health conditions in  
5 this population could worsen racial/ethnic disparities.  
6  
7  
8  
9

## 10 11 12 **ARTICLE SUMMARY**

### 13 14 **Strengths and limitations of this study**

- 15  
16 • This study describes the probation population using linked county administrative and  
17 electronic health record data sets.
- 18  
19 • Health conditions were determined by electronic health record diagnosis codes and  
20 probation status was determined by county data, eliminating recall and social desirability  
21 bias.
- 22  
23 • Analyzing linked data sets provides county-specific, granular information that can inform  
24 local policies.
- 25  
26 • Results were restricted to individuals in Hennepin County, Minnesota, and may not be  
27 generalizable.  
28  
29  
30  
31  
32  
33  
34  
35  
36  
37  
38  
39  
40  
41  
42  
43  
44  
45  
46  
47  
48  
49  
50  
51  
52  
53  
54  
55  
56  
57  
58  
59  
60

## INTRODUCTION

More than 3.5 million individuals are on probation in the United States, accounting for nearly 1 in 70 US citizens and totaling more than jail and prison populations combined.<sup>1-3</sup> Probation is an alternative to incarceration, meaning continued criminal justice reform measures may shift more individuals to serve sentences outside of prisons and jails.<sup>4</sup> People on probation are disproportionately from racial and ethnic minority groups and have higher rates of many health conditions, including physical health, mental health, and substance use conditions, compared to the general population.<sup>5,6</sup> Nearly one-quarter of people recently on probation report having a disability.<sup>7</sup> Age-adjusted studies have also shown that individuals on probation have a higher mortality rate than the general public.<sup>8</sup> In addition to their complex health needs, individuals on probation also experience increased barriers to accessing outpatient medical care and disproportionately use emergency department and inpatient care, regardless of insurance status.<sup>6</sup> Justice-involved populations also have considerable social barriers, with high rates of housing insecurity, poverty, and unemployment.<sup>9</sup>

To date, estimates of the health and health care use patterns of probation populations have largely relied on national survey data and include both people currently on probation as well as people who were recently on probation.<sup>6,7</sup> These studies are scarce in number and limited by self-reporting bias, social desirability bias, and an inability to verify both disease diagnoses and probation status. Additionally, these approaches require primary data collection and do not capture local patterns in disease prevalence or corrections practices. Local and regional data are needed to inform tailored health interventions that improve access and health outcomes for individuals on probation.

1  
2  
3  
4  
5  
6 Relative to periods of incarceration, there are unique challenges and opportunities to improve  
7  
8 care and reduce health inequities during probation. While health care is constitutionally required  
9  
10 for individuals who are incarcerated, no such obligation exists for individuals on probation.<sup>10</sup>

11  
12 Yet, because individuals on probation are not incarcerated, they are able to access services in the  
13  
14 community that do not exist in jails and prisons. For example, the Medicaid inmate exclusion  
15  
16 policy prohibits incarcerated individuals from receiving care through Medicaid.<sup>11</sup> Because  
17  
18 people on probation serve sentences in the community, they are able to maintain Medicaid  
19  
20 eligibility and enrollment. Thus, individuals on probation represent a large group with poorly  
21  
22 defined health profiles that could benefit from well-designed health interventions implemented  
23  
24 within the civilian health care system.  
25  
26  
27  
28  
29  
30

31 To address gaps in the extant literature, we estimated the health characteristics and racial/ethnic  
32  
33 health disparities among a probation cohort in Hennepin County using linked administrative  
34  
35 records. Using a comprehensive and cross-sector data source, we sought to provide granular  
36  
37 information about health to inform interventions and practice at the county level. Our primary  
38  
39 aim was to describe the sociodemographic and health characteristics of individuals on probation.  
40  
41 Our secondary aim was to compare health characteristics to a national sample using survey data.  
42  
43 We hypothesized that individuals on probation would have complex sociodemographic profiles,  
44  
45 high health needs compared to general population estimates, and substantial differences in health  
46  
47 conditions by race and ethnicity.  
48  
49  
50  
51  
52  
53

## 54 **METHODS**

55  
56  
57  
58  
59  
60

### Participants and data sources

We used health care claims and administrative probation data to describe health characteristics and disparities among individuals assigned to high-level probation at any point in 2016 with the Hennepin County Department of Community Corrections and Rehabilitation (DOCCR). High-level probation supervision is designed for individuals assessed as being at higher risk of re-offense and assigns one probation officer to oversee 40 individuals on probation. Clients typically meet with their probation officer once a month to discuss compliance with their probation conditions and other needs or problems they might have. We chose to examine individuals on high-level supervision because they frequently interact with probation officers. Thus, there are more opportunities for modifications to programming and outreach than for individuals on low- or mid-level supervision. We excluded people on warrant status because warrants are typically issued when someone cannot be located, and thus cannot actively be involved in probation. Individuals were included in our final cohort if they had six or more months of enrollment for a full-benefit Minnesota public health insurance program (Minnesota Health Care Plan [MHCP]) between Jan 1, 2013 and Dec 31, 2016 and were adults age 18 or older on probation in 2016.

Health and health insurance enrollment data were drawn from claims from any MHCP, but primarily consisted of programs available through the Affordable Care Act: Medicaid expansion, for individuals with incomes  $\leq$  138% of the federal poverty level (FPL), and MinnesotaCare, the basic health plan for individual  $>$  138% FPL and  $\leq$  200% FPL. Criminal justice data came from multiple sources, including DOCCR probation records, court administrative data, and statewide incarceration data. Housing and social service data came from Hennepin County administrative

1  
2  
3 records. Health and criminal justice data were linked using *Link Plus* to probabilistically match  
4  
5 on name and date of birth. Social service and housing data were linked to health data using a  
6  
7 county-assigned, person-specific ID.  
8  
9

## 12 **Patient and Public Involvement**

14 Patients or the public were not involved in designing, conducting, reporting, or plans for  
15  
16 disseminating our research.  
17  
18

## 19 **Outcomes**

21 We used International Classification of Diseases (ICD) codes to assess physical health, mental  
22  
23 health, and substance use diagnoses. ICD ninth revision codes (ICD-9) were used for conditions  
24  
25 documented between January 1, 2013 and September 30, 2015 and ICD tenth revision codes  
26  
27 (ICD-10) were used for diagnoses documented between October 1, 2015 and December 31,  
28  
29 2016. Chronic Condition Data Warehouse (CCW) Chronic Condition Categories were used to  
30  
31 group diagnosis codes to describe physical and mental health conditions.<sup>12</sup> Physical health  
32  
33 conditions included hypertension, heart disease, cancer, asthma, arthritis, diabetes, chronic  
34  
35 kidney disease, chronic obstructive pulmonary disease (COPD), and viral hepatitis. We also  
36  
37 assessed pregnancy among women of childbearing age (ages 18-44) within the last twelve  
38  
39 months of ending probation. Mental health diagnoses included depression, anxiety, bipolar  
40  
41 disorder, post-traumatic stress disorder (PTSD), and schizophrenia and other psychotic disorders.  
42  
43 The latter category, schizophrenia and other psychotic disorders, we defined as a comparator to  
44  
45 NSDUH's estimates of serious mental illness. SUD groupings were derived from Healthcare  
46  
47 Cost and Utilization Project definitions.<sup>13,14</sup> Conditions included alcohol, cannabis, opioid,  
48  
49 methamphetamine, cocaine/crack, sedatives, or unspecified/other SUDs.  
50  
51  
52  
53  
54  
55  
56  
57  
58  
59  
60

### **Sociodemographic characteristics**

We examined a range of sociodemographic factors including age, gender, race/ethnicity, health insurance enrollment, employment status, education level, number of children, and marital status. Health insurance type was determined by any full or partial month of enrollment at any point while on probation in 2016. Sociodemographic variables, with the exception of health insurance enrollment, were determined based on DOCCR administrative data.

To better understand the non-health care needs of individuals on probation, we also examined use of other safety-net services. We estimated the number of individuals who used a variety of social programs, including the supplemental nutrition assistance program (SNAP), general assistance, temporary assistance for needy families (TANF), or cash assistance. We also assessed the proportion of individuals who used emergency shelter or supportive housing services.

### **Statistical Analysis**

We first described sociodemographic characteristics among all individuals on high-level probation and then stratified characteristics by race/ethnicity.

Next, we described the proportion of individuals on probation who used social services and housing supports. We examined use of these services at any point while an individual who met our health insurance enrollment criteria was on probation in 2016.

1  
2  
3 We then analyzed the unadjusted prevalence of health conditions among our probation cohort  
4 using ICD9 and ICD10 codes.  
5  
6  
7  
8  
9

10 For our general population comparisons, we used the Behavioral Risk Factor Surveillance  
11 System (BRFSS) to ascertain the general population prevalence of several physical health  
12 conditions in Minnesota. BRFSS is conducted by the US Centers for Disease Control and  
13 Prevention and is a telephone-based survey.<sup>15</sup> We used the 2015-2016 National Survey on Drug  
14 Use and Health (NSDUH) for national rates of substance use disorder (SUD) and mental health  
15 conditions in the general population.<sup>16, 17</sup> NSDUH does not provide state-level variables in its  
16 public use data file. NSDUH is conducted by the US Substance Abuse and Mental Health  
17 Services Administration and is a household survey conducted by a trained interviewer. Both  
18 BRFSS and NSDUH are widely used, population-based surveys that are intended to provide  
19 national and state-level estimates of physical health, mental health, and substance use conditions.  
20  
21  
22  
23  
24  
25  
26  
27  
28  
29  
30  
31  
32  
33  
34  
35  
36  
37  
38  
39  
40  
41  
42  
43  
44  
45  
46  
47  
48  
49  
50  
51  
52  
53  
54  
55  
56  
57  
58  
59  
60

To provide comparisons to disease prevalence data in the general population, we compared rates  
of physical health conditions among individuals in our probation cohort to the general population  
in Minnesota using data from BRFSS. Similarly, we compared rates of certain substance use and  
mental health diagnoses to similar conditions among a national population in NSDUH.

Comparisons between our probation cohort and survey populations were estimated using linear  
probability models and were adjusted for age and gender to eliminate confounding health risk

1  
2  
3 factors. For comparisons to national data, each observation in the high-supervision probation  
4 data was assigned single unit weight. Weights for observations from national and state survey  
5 data were re-scaled to match the size of the high-level supervision probation cohort before  
6 performing comparisons. We generated predicted probabilities adjusted for age and gender using  
7 Stata's *margins* command and set covariates at mean values of our probation cohort.  
8  
9  
10  
11  
12  
13

14  
15  
16  
17 Finally, we evaluated rates of health conditions among individuals on probation by race and  
18 ethnicity and assessed the significance of these differences after adjusting for age and gender.  
19  
20  
21  
22  
23

24 This study was approved by the Hennepin Healthcare Institutional Review Board. All analyses  
25 used *Stata* 15.1 (College Station, TX). We considered  $P < .05$  to be statistically significant.  
26  
27  
28  
29  
30

## 31 RESULTS

### 32 Sociodemographic characteristics of individuals on high-level probation

33  
34 Of the 7,992 adults on high-level probation in Hennepin county in 2016, our sample consisted of  
35 5,873 adults who met enrollment criteria (**Table 1**). Individuals on high level probation in  
36 Hennepin County were predominantly young (mean age 35.5), male (80.5%) and Black or  
37 African American (52.9%). They were unemployed at higher rates than the general public  
38 (38.2% among individuals on probation vs 3.9% in Minnesota [not reported in table]).<sup>18</sup> Among  
39 those with available data, the majority had one or more children (72.4%). Most individuals were  
40 enrolled in Medicaid (**Table 1**) while on probation in 2016 (80.7%). Of the individuals enrolled  
41 in Medicaid, a majority (65.9%) were eligible via Medicaid expansion under the Affordable Care  
42 Act. Sociodemographic profiles varied considerably by race and ethnicity (**Supplemental 1**).  
43  
44  
45  
46  
47  
48  
49  
50  
51  
52  
53  
54  
55  
56  
57  
58  
59  
60



### **Social service and housing services among individuals on probation**

Over half of individuals on probation received food support (**Table 1**), and 39.2% received some form of income support while on probation. General Assistance was the most common at 27.1%. Approximately 6.8% utilized shelter or supportive housing services while on probation in 2016.

### **Health characteristics of individuals on high-level probation**

In unadjusted analyses, 35.0% of individuals on probation in Hennepin County had one or more chronic physical health condition despite a mean age of 35.5 (**Table 2**). Hypertension (17.3%) and asthma (14.3%) were the most common physical health conditions. A majority of individuals had either a diagnosed SUD (66.4%) or mental health diagnosis (55.0%). Among the diagnosed SUDs, alcohol use disorder was the most common (41.2%), followed by cannabis (29.0%) and opioids (18.3%). Among diagnosed mental health conditions, anxiety and depression were most common (42.9% and 41.9%, respectively). Close to half of the individuals on probation had both a diagnosed SUD and mental health condition (44.9%).

### **Health characteristics of individuals on high-level probation compared to general population estimates**

In adjusted analyses, individuals on probation in Hennepin County were significantly more likely ( $P<.001$ ) to have nearly all physical health conditions measured in this study as compared to the general population in Minnesota, with the exception of arthritis (**Table 3**).

Individuals on probation in Hennepin County were significantly more likely ( $P<.001$ ) to have any of the reported diagnosed SUDs (66.5% vs. 8.1%), as well as any mental health condition

1  
2  
3 (55.3% vs. 14.4%) compared with a national sample from NSDUH (**Table 3**). Specifically,  
4 individuals on probation in Hennepin County were more likely to have a diagnosis of severe  
5 mental illness (12.5% vs. 4.3%) and depression (41.6% vs. 9.4%) as compared to the general  
6 population. Individuals on probation in Hennepin County were nearly twenty times more likely  
7 to have both a diagnosed SUD and mental health condition compared with the general population  
8 (44.7% vs. 2.6%).  
9  
10  
11  
12  
13  
14  
15  
16  
17  
18

### 19 **Health characteristics of individuals on probation by race/ethnicity**

20  
21 Among individuals on probation in Hennepin County, Black or African American individuals  
22 had significantly higher rates of physical health diagnoses when compared with white, non-  
23 Hispanic individuals (**Table 4**). Black or African American individuals were less likely to have a  
24 diagnosed SUD or mental health conditions when compared with white, non-Hispanic  
25 individuals, (62.0% vs. 71.6%,  $P<.001$ ; 48.5% vs. 64.9%,  $P<.001$ ), but had significantly higher  
26 rates of several select conditions, including cannabis use (30.7%), cocaine use (17.6%) and  
27 severe mental illness (13.6%). White, non-Hispanic individuals had the highest rates of  
28 diagnosed methamphetamine use disorders (29.1%) compared with other race/ethnicity  
29 subcategories. Native American individuals had the highest rates of diagnosed opioid use  
30 disorder compared to other race or ethnic groups, with rates nearly double that of white, non-  
31 Hispanics. However, white, non-Hispanic individuals had diagnosed opioid use disorder at over  
32 twice the rate of Black or African American and Asian or Pacific Island individuals. Overall,  
33 white, non-Hispanic and Native American individuals had the highest rates of many mental  
34 health condition diagnoses.  
35  
36  
37  
38  
39  
40  
41  
42  
43  
44  
45  
46  
47  
48  
49  
50  
51  
52  
53  
54  
55  
56  
57  
58  
59  
60

## DISCUSSION

In this analysis of linked cross-sector administrative data, we found that individuals on probation had complex sociodemographic profiles as well as high rates of chronic physical, mental health, and substance use conditions. Individuals on probation had poorer health compared with the general population in nearly every assessed category. Substance use and mental health conditions were particularly prevalent, with 44.9% of individuals on probation having simultaneous diagnoses for substance use and mental health conditions. These findings add to a growing body of literature that indicate individuals on probation have substantial physical and behavioral health needs, which necessitate access to quality health care while on supervision. Additionally, the frequent use of safety-net services highlights the considerable social barriers faced by people on probation. We show that local administrative data can be used to glean important insights about the health of this key population, without requiring primary data collection, and provide more detailed information related to mental health and substance use diagnoses. For example, we quantified the prevalence of specific SUDs and mental health diagnoses to show that use of multiple different substances is common within this population, as are numerous coexisting mental health diagnoses, suggesting that interventions focused on one particular substance or mental health condition may not be effective.

Consistent with previous studies of health in justice-involved populations, we found significant health differences between racial and ethnic groups in our probation cohort.<sup>19,20</sup> Unlike previous national studies which found similar rates of chronic disease among white, Black, and Native American individuals, we found higher levels of physical health conditions among Black and Native American individuals compared with white, non-Hispanic individuals.<sup>4</sup> However, our

1  
2  
3 findings are consistent with other work using NSDUH that found self-reported mental illness  
4 was higher among white, non-Hispanic individuals compared with other racial and ethnic  
5 groups.<sup>21-23</sup> We build on this work using diagnosed conditions to show that severe mental illness  
6 (e.g., schizophrenia and other psychotic disorders) was more often diagnosed among Black  
7 individuals, while lower severity mental illness (e.g., anxiety and depression) was less diagnosed  
8 compared with white, non-Hispanics. It is important to consider how structural racism may  
9 contribute to these differences in physical and mental health conditions and SUDs between racial  
10 and ethnic groups. A growing body of evidence points to public policies and institutional  
11 practices that perpetuate disparities in who becomes involved in the criminal legal system and  
12 how individuals are diagnosed with and treated for their health conditions.<sup>24,25</sup> Future research  
13 should consider how policies and practices in the criminal legal and health care systems can  
14 promote health and reduce inequities among people on probation.  
15  
16  
17  
18  
19  
20  
21  
22  
23  
24  
25  
26  
27  
28  
29  
30

31  
32  
33 Our findings can inform interventions specific to the unique barriers and opportunities that exist  
34 during a period of probation. For example, given the rates of physical, mental, and substance use  
35 conditions, individuals on probation should have the opportunity to connect with a trusted health  
36 care partner to assess, diagnose, and treat underlying medical conditions. These assessments  
37 should be free of coercion and should not be predicated on the conditions of supervision.  
38  
39 Probation offices should prioritize programs that help clients enroll in and maintain health  
40 insurance, particularly in Medicaid expansion states, and social services. Next, the high rates of  
41 safety-net service use in our cohort argue for collaboration between health care services and  
42 community services in order to address unmet needs relating to social determinants of health.  
43  
44 Finally, the disaggregation of health conditions by race and ethnicity can inform interventions  
45  
46  
47  
48  
49  
50  
51  
52  
53  
54  
55  
56  
57  
58  
59  
60

1  
2  
3 that recognize and address existing health inequities. For example, because of different rates of  
4 specific substance use between racial/ethnic groups, focusing an intervention on only the most  
5 prevalent substance use disorder has the potential to disproportionately benefit one racial/ethnic  
6  
7  
8  
9  
10 group and unintentionally exacerbate disparities.. Our data suggest that an isolated focus on more  
11  
12 prevalent substances, such as opioids or methamphetamine, could unintentionally contribute to  
13  
14 and perpetuate racial inequities. Programs that provide access to treatment for any type of  
15  
16 substance use are likely to be more equitable than programs focusing on a single common  
17  
18  
19 substance.  
20  
21  
22  
23

24 This study has several limitations. First, individuals were only included if they had six or more  
25  
26 months of eligibility for a full-benefit MHCP in the previous three years. Omitting individuals  
27  
28 who did not qualify for public health care plans could potentially drop individuals who have  
29  
30 incomes too high to qualify for such plans. Second, although we controlled for age and gender,  
31  
32 our comparison populations of BRFSS for physical conditions and NSDUH for mental health  
33  
34 conditions and SUDs were self-reported conditions and we did not have access to diagnosis  
35  
36 information for a general population cohort. Third, our study focused on an urban, Midwest  
37  
38 county and it is possible that our findings do not generalize when assessed nationally, though  
39  
40 they should be comparable to other urban jurisdictions. Finally, while we stratified our findings  
41  
42 by race/ethnicity, we do not directly measure the contribution of racism to the disparities we  
43  
44  
45 identified.  
46  
47  
48  
49  
50

51 Our study describes the unique health needs of people on probation and highlights the  
52  
53 racial/ethnic differences that exist within this population. By linking local administrative data  
54  
55  
56  
57  
58  
59  
60

1  
2  
3 across public sectors, jurisdictions can identify opportunities to improve programs and connect  
4 individuals to needed resources. This work also highlights the importance of disaggregating  
5 diagnoses by race and ethnicity to inform policy decisions. Often overlooked in discussions of  
6 correctional health care, people on probation represent a key population for whom targeted  
7 public health interventions could improve health and address existing inequities.  
8  
9  
10  
11  
12  
13  
14  
15  
16

## 17 **FUNDING**

18  
19 This project was supported with funding from the University of Minnesota's Grand Challenges  
20 Research Initiative.  
21  
22  
23  
24  
25

## 26 **DATA AVAILABILITY**

27  
28 Data are not available.  
29  
30  
31  
32

## 33 **CONTRIBUTORS**

34  
35 TNW was responsible for the study design, funding, and initial analysis. PB and JW performed  
36 the analyses. MO, RJS, and TNW drafted the manuscript. CH critically revised the manuscript  
37 for important intellectual content. All authors read and approved the final manuscript.  
38  
39  
40  
41  
42  
43

## 44 **CONFLICT OF INTEREST**

45  
46 The authors have nothing to disclose.  
47  
48  
49  
50

## 51 **ETHICS STATEMENT**

52  
53  
54  
55  
56  
57  
58  
59  
60

1  
2  
3 This study was approved by the Hennepin Healthcare Research Institute Institutional Review  
4 Board (Study ID: 18\_4509). All data were obtained from preexisting records and no individual  
5  
6 consent was required.  
7  
8  
9  
10  
11  
12  
13  
14  
15  
16  
17  
18  
19  
20  
21  
22  
23  
24  
25  
26  
27  
28  
29  
30  
31  
32  
33  
34  
35  
36  
37  
38  
39  
40  
41  
42  
43  
44  
45  
46  
47  
48  
49  
50  
51  
52  
53  
54  
55  
56  
57  
58  
59  
60

**Table 1.** Demographics, public health insurance prevalence, and social service use of individuals on high-level probation in Hennepin County, Minnesota, any time during 2016

|                                                                              | HC probation cohort |       |
|------------------------------------------------------------------------------|---------------------|-------|
|                                                                              | n                   | %     |
| <b>Cohort</b>                                                                |                     |       |
| High-level probation meeting enrollment criteria                             | 5873                | -     |
| Median age                                                                   |                     | 33.0  |
| Mean age                                                                     |                     | 35.5  |
| Male                                                                         | 4726                | 80.5% |
| <b>Race/ethnicity</b>                                                        |                     |       |
| White, non-Hispanic                                                          | 2055                | 35.0% |
| Black or African American                                                    | 3104                | 52.9% |
| Native American                                                              | 324                 | 5.5%  |
| Asian or Pacific Islander                                                    | 114                 | 1.9%  |
| Hispanic                                                                     | 212                 | 3.6%  |
| Other                                                                        | 64                  | 1.1%  |
| <b>Health insurance enrollment (while on high-level probation in 2016)</b>   |                     |       |
| Any Minnesota Health Care Plan (MHCP)                                        | 5116                | 87.1% |
| Consolidated treatment fund                                                  | 1346                | 22.9% |
| Any full-benefit MHCP                                                        | 4931                | 84.0% |
| Medicaid                                                                     | 4742                | 80.7% |
| MinnesotaCare                                                                | 5116                | 4.6%  |
| <b>Medicaid Eligibility Types (among those enrolled in Medicaid in 2016)</b> |                     |       |
| Expansion                                                                    | 3126                | 65.9% |
| Disability, no Medicare/SS                                                   | 472                 | 10.0% |
| Disability, with Medicare/SS                                                 | 327                 | 6.9%  |
| Parent                                                                       | 808                 | 17.0% |
| Other                                                                        | 328                 | 6.9%  |
| <b>Employment</b>                                                            |                     |       |
| Part-time                                                                    | 1039                | 17.7% |
| Full-time                                                                    | 1347                | 22.9% |
| Unemployed                                                                   | 2242                | 38.2% |
| Other                                                                        | 131                 | 2.2%  |
| Unknown                                                                      | 1114                | 19.0% |
| <b>Education</b>                                                             |                     |       |
| High school, not completed                                                   | 1258                | 21.4% |
| High school, completed                                                       | 1360                | 23.2% |
| GED                                                                          | 725                 | 12.3% |
| Some college or higher education                                             | 1442                | 24.6% |
| Unknown                                                                      | 1088                | 18.5% |
| <b>Children</b>                                                              |                     |       |
| 0 Children                                                                   | 1622                | 27.6% |
| 1 Child                                                                      | 998                 | 17.0% |
| 2 Children                                                                   | 812                 | 13.8% |
| 3+ Children                                                                  | 1272                | 21.7% |
| Unknown                                                                      | 1169                | 19.9% |
| <b>Marital Status</b>                                                        |                     |       |
| Married                                                                      | 408                 | 6.9%  |
| Single                                                                       | 4399                | 74.9% |
| Unknown                                                                      | 1066                | 18.2% |
| <b>Social Service Use</b>                                                    |                     |       |
| Food Support (SNAP)                                                          | 3189                | 54.3% |
| Cash Support                                                                 | 2305                | 39.2% |
| General Assistance                                                           | 1593                | 27.1% |
| Temporary Assistance for Needy Families                                      | 491                 | 8.4%  |
| Other income support                                                         | 328                 | 5.6%  |
| Group Residential Housing                                                    | 873                 | 14.9% |
| Shelter                                                                      | 398                 | 6.8%  |

Counts for people on high-level probation any time during 2016 and with 6+ months full-benefit public health insurance eligibility between 2013 and 2016 in Minnesota.

Minnesota Health Care Plans (MHCP) includes any full or partial month while on high-level probation in 2016. Counts are not exclusive and do not add up to 100 percent.



**Table 2.** Health conditions of individuals on high-level probation in Hennepin County, Minnesota, any time during 2016

| Cohort                                                 | HC probation cohort |       |
|--------------------------------------------------------|---------------------|-------|
|                                                        | <i>n</i>            | %     |
| <b>Cohort</b>                                          | 5873                |       |
| Women of childbearing age (18-44 years)                | 932                 | 11.7% |
| <b>Physical Conditions</b>                             |                     |       |
| Hypertension                                           | 1015                | 17.3% |
| Asthma                                                 | 842                 | 14.3% |
| Arthritis                                              | 513                 | 8.7%  |
| Diabetes                                               | 346                 | 5.9%  |
| Cancer                                                 | 29                  | 0.5%  |
| Heart Disease                                          | 157                 | 2.7%  |
| Chronic Kidney Disease                                 | 337                 | 5.7%  |
| COPD                                                   | 211                 | 3.6%  |
| Viral Hepatitis                                        | 276                 | 4.7%  |
| <b>Number of Chronic Physical Conditions*</b>          |                     |       |
| 0                                                      | 3815                | 65.0% |
| 1                                                      | 1146                | 19.5% |
| 2+                                                     | 912                 | 15.5% |
| <b>Pregnant in last 12 mos. (% of women age 18-44)</b> | 99                  | 10.6% |
| <b>Substance Use Disorders (SUD)</b>                   |                     |       |
| Any SUD                                                | 3901                | 66.4% |
| Alcohol                                                | 2417                | 41.2% |
| Cannabis                                               | 1703                | 29.0% |
| Opioid                                                 | 1074                | 18.3% |
| Methamphetamine                                        | 936                 | 15.9% |
| Cocaine/crack                                          | 852                 | 14.5% |
| Sedatives                                              | 182                 | 3.1%  |
| Unspecified/other SUD                                  | 1732                | 29.5% |
| Two or more SUD                                        | 1957                | 33.3% |
| <b>Mental Health</b>                                   |                     |       |
| Any mental health                                      | 3233                | 55.0% |
| Depression                                             | 2461                | 41.9% |
| Anxiety                                                | 2517                | 42.9% |
| Bipolar                                                | 1195                | 20.3% |
| PTSD                                                   | 1000                | 17.0% |
| Severe mental illness                                  | 748                 | 12.7% |
| <b>SUD + MI</b>                                        |                     |       |
| Any SUD and any MI                                     | 2635                | 44.9% |

Counts for people on high-level probation any time during 2016 and with 6+ months full-benefit public health insurance eligibility between 2013 and 2016 in Minnesota

Includes people with violation status, but not warrant status

Conditions from ICD9 diagnosis codes 2013-Q3 2015, ICD10 codes Q4 2015-2016. Physical and mental health conditions grouped according to CMS Chronic Conditions Warehouse specifications. SUD conditions grouped according to Healthcare Cost and Utilization Project specifications, excluding remission codes.

\*Chronic physical conditions include hypertension, chronic kidney disease, coronary artery disease, diabetes, cancer, stroke, asthma, arthritis, and chronic obstructive pulmonary disease

**Table 3.** Health condition prevalence of individuals on high-level probation in Hennepin County, Minnesota, any time during 2016, versus general population

|                                      | HC probation cohort,<br>adjusted for age and sex<br>(95% CI) | BRFSS comparison,<br>adjusted for age and sex<br>(95% CI) | NSDUH comparison,<br>adjusted for age and<br>sex (95% CI) |
|--------------------------------------|--------------------------------------------------------------|-----------------------------------------------------------|-----------------------------------------------------------|
|                                      | <i>n</i> = 5873                                              |                                                           |                                                           |
| <b>Physical Conditions</b>           |                                                              |                                                           |                                                           |
| Hypertension                         | 17.0% (16.0% - 18.0%)                                        | 12.5% (11.4% - 13.6%)                                     |                                                           |
| Asthma                               | 14.5% (13.6% - 15.4%)                                        | 5.5% (4.9% - 6.1%)                                        |                                                           |
| Arthritis                            | 7.8% (7.0% - 8.5%)†                                          | 8.2% (7.6% - 8.8%)†                                       |                                                           |
| Diabetes                             | 5.7% (5.1% - 6.4%)                                           | 3.2% (2.8% - 3.7%)                                        |                                                           |
| Chronic Kidney Disease               | 5.8% (5.1% - 6.4%)                                           | 0.2% (-0.1% - 0.5%)                                       |                                                           |
| COPD                                 | 3.4% (2.9% - 4.0%)                                           | 1.2% (0.8% - 1.5%)                                        |                                                           |
| <b>Substance Use Disorders (SUD)</b> |                                                              |                                                           |                                                           |
| Any SUD                              | 66.5% (65.3% - 67.7%)                                        |                                                           | 8.1% (7.6% - 8.5%)                                        |
| Alcohol                              | 40.9% (39.7% - 42.2%)                                        |                                                           | 6.3% (5.9% - 6.7%)                                        |
| Cannabis                             | 28.3% (27.1% - 29.5%)                                        |                                                           | 1.7% (1.5% - 1.8%)                                        |
| Opioid                               | 17.6% (16.6% - 18.6%)                                        |                                                           | 0.7% (0.6% - 0.8%)                                        |
| Methamphetamine                      | 14.9% (14.0% - 15.9%)                                        |                                                           | 0.2% (0.2% - 0.3%)                                        |
| Cocaine/crack                        | 13.2% (12.3% - 14.1%)                                        |                                                           | 0.2% (0.2% - 0.3%)                                        |
| Sedatives                            | 2.9% (2.5% - 3.4%)                                           |                                                           | 0.1% (0.0% - 0.1%)                                        |
| <b>Mental Health</b>                 |                                                              |                                                           |                                                           |
| Any mental health condition          | 55.3% (54.0% - 56.6%)                                        |                                                           | 14.4% (13.4% - 15.1%)                                     |
| Depression                           | 41.6% (40.4% - 42.9%)                                        |                                                           | 9.4% (8.9% - 10%)                                         |
| Severe mental illness                | 12.5% (11.7% - 13.4%)                                        |                                                           | 4.3% (3.9% - 4.6%)                                        |
| <b>SUD + MI</b>                      |                                                              |                                                           |                                                           |
| Any SUD and any MI                   | 44.7% (43.4% - 46.0%)                                        |                                                           | 2.6% (2.3% - 2.8%)                                        |

Counts for people on high-level probation any time during 2016 and with 6+ months full-benefit public health insurance eligibility between 2013 and 2016 in Minnesota.

Includes people with violation status, but not warrant status.

Conditions from ICD9 diagnosis codes 2013-Q3 2015, ICD10 codes Q4 2015-2016. Physical and mental health conditions grouped according to CMS Chronic Conditions Warehouse specifications. SUD conditions grouped according to Healthcare Cost and Utilization Project specifications, excluding remission codes.

Adjusted to age and gender distributions for the high-level cohort. Physical condition comparisons use Behavioral Risk Factor Surveillance System 2015-2016 values for Minnesota, SUD and MI conditions use National Survey on Drug Use and Health values for the U.S.

Based on bivariate statistical testing, all values were significant ( $p < .0001$ ) with the exception of those marked with †, which were not significantly different.

**Table 4.** Health conditions of individuals on high-level probation in Hennepin County, Minnesota, any time during 2016, by race and ethnicity**HC probation cohort**

|                                                    | <b>White, non-Hispanic<br/>(N=2055)</b> | <b>Black or African<br/>American (N=3103)</b> | <b>Native American<br/>(N=324)</b> | <b>Asian or Pacific<br/>Islander (N=114)</b> | <b>Hispanic<br/>(N=212)</b> |
|----------------------------------------------------|-----------------------------------------|-----------------------------------------------|------------------------------------|----------------------------------------------|-----------------------------|
| <b>Physical Conditions</b>                         | <b>%</b>                                | <b>%</b>                                      | <b>%</b>                           | <b>%</b>                                     | <b>%</b>                    |
| Asthma                                             | 10.8% (9.5% - 12.2%)                    | 17.4%*** (16.1% - 18.8%)                      | 12.9% (9.5% - 16.4%)               | 11.0% (5.2% - 16.9%)                         | 12.9% (8.4% - 17.5%)        |
| Diabetes                                           | 4.2% (3.4% - 5.0%)                      | 6.8%*** (5.9% - 7.7%)                         | 10.2%*** (7.0% - 13.4%)            | 3.9% (0.2% - 7.5%)                           | 8.4% (4.3% - 12.5%)         |
| Hypertension                                       | 13.7% (12.4% - 15.0%)                   | 20.5%*** (19.1% - 21.8%)                      | 20.1%** (16.2% - 24.1%)            | 9.8% (4.4% - 15.1%)                          | 16.2% (11.1% - 21.3%)       |
| Arthritis                                          | 7.2% (6.2% - 8.1%)                      | 10.2%*** (9.1% - 11.2%)                       | 12.4%** (9.1% - 15.7%)             | 2.1%*** (-0.7% - 4.9%)                       | 5.9% (2.2% - 9.6%)          |
| CKD                                                | 5.2% (4.3% - 6.1%)                      | 6.0% (5.1% - 6.8%)                            | 7.7% (4.8% - 10.6%)                | 5.4% (1.2% - 9.5%)                           | 5.5% (2.2% - 8.8%)          |
| COPD                                               | 3.7% (2.9% - 4.4%)                      | 3.7% (3.0% - 4.4%)                            | 3.4% (1.4% - 5.3%)                 | 2.8% (-0.3% - 5.9%)                          | 2.5% (0.1% - 4.9%)          |
| Viral Hepatitis                                    | 6.1% (5.1% - 7.0%)                      | 3.1%*** (2.5% - 3.8%)                         | 10.1%* (6.9% - 13.3%)              | 0.9%*** (-0.8% - 2.6%)                       | 5.7% (2.3% - 9.1%)          |
| IHD                                                | 2.6%*** (1.9% - 3.2%)                   | 2.8%*** (2.2% - 3.3%)                         | 2.7%** (0.9% - 4.6%)               | 2.8% (-0.3% - 5.9%)                          | 3.8%* (0.9% - 6.7%)         |
| Cancer                                             | 0.3%** (0.1% - 0.5%)                    | 0.7%*** (0.4% - 1.0%)                         | 0.7% (-0.2% - 1.6%)                | -                                            | 0.5% (-0.5% - 1.5%)         |
| Average # of chronic<br>physical conditions (0-9)* | 0.52 (0.48 - 0.55)                      | 0.73 (0.69 - 0.76)***                         | 0.75 (0.63 - 0.87)***              | 0.42 (0.25 - 0.59)                           | 0.56 (0.41 - 0.71)          |
| <b>Substance use disorders</b>                     |                                         |                                               |                                    |                                              |                             |
| Any SUD                                            | 71.6% (69.7% - 73.6%)                   | 62.0%*** (60.3% - 63.7%)                      | 85.9%*** (82.0% - 89.7%)           | 47.7%*** (38.6% - 56.8%)                     | 66.3% (60.1% - 72.5%)       |
| Alcohol                                            | 43.3% (41.2% - 45.4%)                   | 38.5%** (36.8% - 40.2%)                       | 59.2%*** (53.9% - 64.4%)           | 24.8%*** (17.0% - 32.7%)                     | 42.5% (35.9% - 49.1%)       |
| Cannabis                                           | 27.3% (25.3% - 29.2%)                   | 30.7%** (29.1% - 32.3%)                       | 35.8%** (30.6% - 40.9%)            | 8.8%*** (3.6% - 13.9%)                       | 21.5%* (16.2% - 26.9%)      |
| Cocaine                                            | 10.1% (8.9% - 11.3%)                    | 17.6%*** (16.2% - 18.9%)                      | 20.5%*** (16.3% - 24.7%)           | 5.6%* (1.3% - 9.9%)                          | 16.4%* (11.2% - 21.5%)      |
| Methamphetamine                                    | 29.1% (27.1% - 31.1%)                   | 5.5%*** (4.7% - 6.3%)                         | 27.9% (23.1% - 32.7%)              | 17.4%** (10.6% - 24.3%)                      | 15.0%*** (10.2% - 19.8%)    |
| Opioids                                            | 24.8% (22.9% - 26.6%)                   | 11.5%*** (10.3% - 12.6)                       | 41.2%*** (35.9% - 46.5%)           | 7.2%*** (2.4% - 12.0%)                       | 23.5% (17.7% - 29.2%)       |
| Sedatives                                          | 5.8% (4.8% - 6.9%)                      | 1.1%*** (0.7% - 1.4%)                         | 3.9% (1.9% - 5.9%)                 | 1.8%*** (-0.7% - 4.2%)                       | 6.4% (3.1% - 9.6%)          |
| Unspecified SUD                                    | 35.6% (33.6% - 37.7%)                   | 24.8%*** (23.3% - 26.4%)                      | 41.7%* (36.4% - 47.1%)             | 17.1%*** (10.2% - 24.0%)                     | 23.4%*** (17.7% - 29.2%)    |
| <b>Mental Health</b>                               |                                         |                                               |                                    |                                              |                             |
| Any MI                                             | 64.9% (62.8% - 66.9%)                   | 48.5%*** (46.8% - 50.3%)                      | 67.5% (62.3% - 72.6%)              | 34.6%*** (26.1% - 43.1%)                     | 52.8%** (46.3% - 59.3%)     |
| Anxiety                                            | 53.0% (50.9% - 55.1%)                   | 35.4%*** (33.7% - 37.0%)                      | 55.1% (49.7% - 60.6%)              | 28.3%*** (20.1% - 36.4%)                     | 44.0%* (37.5% - 50.6%)      |
| Bipolar                                            | 23.5% (21.7% - 25.3%)                   | 18.6%*** (17.2% - 20.0%)                      | 19.4% (15.3% - 23.5%)              | 10.9%*** (5.2% - 16.7%)                      | 20.2% (14.7% - 25.6%)       |
| Depression                                         | 49.0% (46.9% - 51.1%)                   | 36.8%*** (35.2% - 38.5%)                      | 51.4% (46.0% - 56.7%)              | 24.0%*** (16.3% - 31.7%)                     | 42.3% (35.9% - 48.7%)       |
| PTSD                                               | 17.3% (15.7% - 18.8%)                   | 16.6% (15.3% - 17.9%)                         | 22.2%* (17.9% - 26.4%)             | 9.1%** (3.8% - 14.4%)                        | 17.6% (12.4% - 22.7%)       |
| Severe mental<br>illness                           | 11.2% (9.9% - 12.6%)                    | 13.6%* (12.4% - 14.9%)                        | 16.6%* (12.6% - 20.7%)             | 9.8% (4.3% - 15.2%)                          | 10.9% (6.5% - 15.2%)        |
| <b>SUD + MI</b>                                    |                                         |                                               |                                    |                                              |                             |
| Any SUD and any MI                                 | 53.2% (51.1% - 55.3%)                   | 38.5%*** (36.8% - 40.1%)                      | 63.9%*** (58.7% - 69.2%)           | 21.8%*** (14.3% - 29.4%)                     | 42.9%** (36.3% - 49.4%)     |
| <b>Other conditions</b>                            |                                         |                                               |                                    |                                              |                             |
| Personality<br>disorders                           | 15.4% (13.9% - 16.9%)                   | 10.0%*** (8.9% - 11.0%)                       | 11.0%* (7.8% - 14.3%)              | 7.3%*** (2.5% - 12.2%)                       | 13.0% (8.3% - 17.7%)        |

Race and ethnicity designations from data maintained by Hennepin County Corrections.

Counts for people on high-level probation any time during 2016 and with 6+ months full-benefit public health insurance eligibility between 2013 and 2016 in Minnesota

Includes people with violation status, but not warrant status.

Conditions from ICD9 diagnosis codes 2013-Q3 2015, ICD10 codes Q4 2015-2016. Physical and mental health conditions grouped according to CMS Chronic Conditions

Warehouse specifications. SUD conditions grouped according to Healthcare Cost and Utilization Project specifications, excluding remission codes.

\*  $p < .05$  in bivariate comparison with White, Non-Hispanic

\*\*  $p < .01$  in bivariate comparison with White, Non-Hispanic

\*\*\*  $p < .001$  in bivariate comparison with White, Non-Hispanic

**REFERENCES**

1. Kaebler D. Probation and Parole in the United States, 2017-2018. Bureau of Justice Statistics; 2020. Available from: <https://www.bjs.gov/content/pub/pdf/ppus1718.pdf>
2. Zeng Z. Jail Inmates in 2018. Bureau of Justice Statistics; 2020. Available from: <https://www.bjs.gov/content/pub/pdf/ji18.pdf>
3. Carson EA. Prisoners in 2018. Bureau of Justice Statistics; 2020. Available from: <https://www.bjs.gov/content/pub/pdf/p18.pdf>
4. Phelps MS. Mass probation: Toward a more robust theory of state variation in punishment. *Punishm Soc.* 2017;19(1):53-73.
5. Maruschak L, Minton TD. Correctional Populations in the United States, 2017-2018. Bureau of Justice Statistics; 2020. Available from: <https://www.bjs.gov/index.cfm?ty=pbdetail&iid=7026>.
6. Hawks L, Wang EA, Howell B, Woolhandler S, Himmelstein DU, Bor D, et al. Health Status and Health Care Utilization of US Adults Under Probation: 2015-2018. *Am J Public Health.* 2020;110(9):1411-7.
7. Winkelmann TNA, Phelps MS, Mitchell KL, Jennings L, Schlafer RJ. Physical Health and Disability Among U.S. Adults Recently on Community Supervision. *J Correct Health Care.* 2020;26(2):129-37.
8. Wildeman C, Goldman AW, Wang EA. Age-Standardized Mortality of Persons on Probation, in Jail, or in State Prison and the General Population, 2001-2012. *Public Health Reports.* 2019;134(6):660-6.

- 1  
2  
3 9. Patel K, Boutwell A, Brockmann BW, Rich JD. Integrating correctional and community  
4 health care for formerly incarcerated people who are eligible for Medicaid. *Health*  
5 *affairs*. 2014;33(3):468-473.  
6  
7
- 8  
9  
10 10. *Estelle v Gamble*, 429 US 97 (1976).  
11
- 12 11. Social Security Act Amendments of 1965, Pub L No. 97, 42 USC §1396d (April 9,  
13 1965).  
14
- 15 12. Center for Medicare & Medicaid Services. Condition Categories. Chronic Conditions  
16 Data Warehouse website. Accessed October 20, 2020.  
17 <https://www2.ccwdata.org/web/guest/condition-categories>  
18  
19
- 20 13. Heslin KC, Elixhauser A. Mental and Substance Use Disorders Among Hospitalized  
21 Teenagers, 2012: Statistical Brief# 202. Published online 2016.  
22  
23
- 24 14. Owens PL, Fingar KR, McDermott KW, Muhuri PK, Heslin KC. Inpatient stays  
25 involving mental and substance use disorders, 2016: Statistical brief# 249. Healthcare  
26 cost and utilization project (HCUP) statistical briefs. Published online 2019.  
27  
28
- 29 15. Pickens CM, Pierannunzi C, Garvin W, Town M. Surveillance for Certain Health  
30 Behaviors and Conditions Among States and Selected Local Areas — Behavioral Risk  
31 Factor Surveillance System, United States, 2015. *MMWR Surveillance Summaries*.  
32 2018;67(9):1-90.  
33  
34
- 35 16. Center for Behavioral Health Statistics and Quality. (2018). *2015 National Survey on*  
36 *Drug Use and Health: Public use file codebook*. Substance Abuse and Mental Health  
37 Services Administration. [https://samhda.s3-us-gov-west-1.amazonaws.com/s3fs-](https://samhda.s3-us-gov-west-1.amazonaws.com/s3fs-public/field-uploads-protected/studies/NSDUH-2015/NSDUH-2015-datasets/NSDUH-2015DS0001/NSDUH-2015-DS0001-info/NSDUH-2015-DS0001-info-codebook.pdf)  
38 [public/field-uploads-protected/studies/NSDUH-2015/NSDUH-2015-datasets/NSDUH-](https://samhda.s3-us-gov-west-1.amazonaws.com/s3fs-public/field-uploads-protected/studies/NSDUH-2015/NSDUH-2015-datasets/NSDUH-2015DS0001/NSDUH-2015-DS0001-info/NSDUH-2015-DS0001-info-codebook.pdf)  
39 [2015DS0001/NSDUH-2015-DS0001-info/NSDUH-2015-DS0001-info-codebook.pdf](https://samhda.s3-us-gov-west-1.amazonaws.com/s3fs-public/field-uploads-protected/studies/NSDUH-2015/NSDUH-2015-datasets/NSDUH-2015DS0001/NSDUH-2015-DS0001-info/NSDUH-2015-DS0001-info-codebook.pdf)  
40  
41  
42  
43  
44  
45  
46  
47  
48  
49  
50  
51  
52  
53  
54  
55  
56  
57  
58  
59  
60

- 1  
2  
3  
4  
5  
6  
7  
8  
9  
10  
11  
12  
13  
14  
15  
16  
17  
18  
19  
20  
21  
22  
23  
24  
25  
26  
27  
28  
29  
30  
31  
32  
33  
34  
35  
36  
37  
38  
39  
40  
41  
42  
43  
44  
45  
46  
47  
48  
49  
50  
51  
52  
53  
54  
55  
56  
57  
58  
59  
60
17. Center for Behavioral Health Statistics and Quality. (2018). *2016 National Survey on Drug Use and Health: Public use file codebook*. Substance Abuse and Mental Health Services Administration. <http://samhda.s3-us-gov-west-1.amazonaws.com/s3fs-public/field-uploads-protected/studies/NSDUH-2016/NSDUH-2016-datasets/NSDUH-2016-DS0001/NSDUH-2016-DS0001-info/NSDUH-2016-DS0001-info-codebook.pdf>
  18. Unemployment Rates for States. *U.S. Bureau of Labor Statistics*, U.S. Bureau of Labor Statistics, 3 Mar. 2021, [www.bls.gov/lau/lastrk16.htm](http://www.bls.gov/lau/lastrk16.htm).
  19. Larney S, Zaller ND, Dumont DM, Willcock A, Degenhardt L. A systematic review and meta-analysis of racial and ethnic disparities in hepatitis C antibody prevalence in United States correctional populations. *Ann Epidemiol*. 2016;26(8):570-8.e2.
  20. Nowotny KM, Rogers RG, Boardman JD. Racial disparities in health conditions among prisoners compared with the general population. *SSM Popul Health*. 2017;3:487-96.
  21. Bronson J, Berzofsky M. Indicators of Mental Health Problems Reported by Prisoners and Jail Inmates, 2011-12. Bureau of Justice Statistics; 2017. Available from: <https://www.bjs.gov/content/pub/pdf/imhprpji1112.pdf>
  22. James D, Glaze L. Mental Health Problems of Prison. Bureau of Justice Statistics; 2006.
  23. Kaba F, Solimo A, Graves J, Glowa-Kollisch S, Vise A, MacDonald R, et al. Disparities in Mental Health Referral and Diagnosis in the New York City Jail Mental Health Service. *Am J Public Health*. 2015;105(9):1911-6.
  24. National Academies of Sciences E and Medicine. *Addressing the Drivers of Criminal Justice Involvement to Advance Racial Equity: Proceedings of a Workshop—in Brief*. The National Academies Press; 2021. doi:10.17226/26151

- 1  
2  
3 25. Binswanger IA, Redmond N, Steiner JF, Hicks LS. Health Disparities and the Criminal  
4  
5 Justice System: An Agenda for Further Research and Action. *J Urban Health*.  
6  
7 2012;89(1):98-107. doi:10.1007/s11524-011-9614-1  
8  
9  
10  
11  
12  
13  
14  
15  
16  
17  
18  
19  
20  
21  
22  
23  
24  
25  
26  
27  
28  
29  
30  
31  
32  
33  
34  
35  
36  
37  
38  
39  
40  
41  
42  
43  
44  
45  
46  
47  
48  
49  
50  
51  
52  
53  
54  
55  
56  
57  
58  
59  
60

**Supplemental 1.** Demographics and public health insurance prevalence of individuals on high-level probation in Hennepin County, Minnesota, any time during 2016 and met MHCP enrollment criteria by race and ethnicity.

| Cohort                                                                       | HC probation cohort |       |                           |       |                 |       |                           |       |          |       |
|------------------------------------------------------------------------------|---------------------|-------|---------------------------|-------|-----------------|-------|---------------------------|-------|----------|-------|
|                                                                              | White, non-Hispanic |       | Black or African American |       | Native American |       | Asian or Pacific Islander |       | Hispanic |       |
|                                                                              | n                   | %     | n                         | %     | n               | %     | n                         | %     | n        | %     |
| High-level probation meeting enrollment criteria                             | 2055                | 35.0% | 3104                      | 52.9% | 324             | 5.5%  | 114                       | 1.9%  | 212      | 3.6%  |
| Median age                                                                   | 35.4                |       | 31.5                      |       | 32.7            |       | 32.3                      |       | 29.2     |       |
| Average age                                                                  | 37.7                |       | 34.4                      |       | 34.7            |       | 35.2                      |       | 32.6     |       |
| Male                                                                         | 1580                | 76.9% | 2629                      | 84.7% | 201             | 62.0% | 97                        | 85.1% | 175      | 82.5% |
| <b>Health Insurance Enrollment (While on high-level probation in 2016)</b>   |                     |       |                           |       |                 |       |                           |       |          |       |
| Any Minnesota Health Care Plan (MHCP)                                        | 1821                | 88.6% | 2670                      | 86.0% | 292             | 90.1% | 95                        | 83.3% | 188      | 88.7% |
| Consolidated treatment fund                                                  | 466                 | 22.7% | 666                       | 21.5% | 129             | 39.8% | 24                        | 21.1% | 55       | 25.9% |
| Any full-benefit MHCP                                                        | 1769                | 86.1% | 2558                      | 82.4% | 282             | 87.0% | 92                        | 80.7% | 181      | 85.4% |
| Medicaid                                                                     | 1676                | 81.6% | 2487                      | 80.1% | 279             | 86.1% | 87                        | 76.3% | 167      | 78.8% |
| MinnesotaCare                                                                | 141                 | 6.9%  | 97                        | 3.1%  | --              | --    | --                        | --    | 18       | 8.5%  |
| <b>Medicaid Eligibility Types (among those enrolled in Medicaid in 2016)</b> |                     |       |                           |       |                 |       |                           |       |          |       |
| Expansion                                                                    | 1218                | 72.7% | 1524                      | 61.3% | 191             | 68.5% | 54                        | 62.1% | 116      | 69.5% |
| Disability, no Medicare/SS                                                   | 107                 | 6.4%  | 323                       | 13.0% | 23              | 8.2%  | --                        | --    | --       | --    |
| Disability, with Medicare/SS                                                 | 129                 | 7.7%  | 177                       | 7.1%  | --              | --    | --                        | --    | --       | --    |
| Parent                                                                       | 247                 | 14.7% | 441                       | 17.7% | 50              | 17.9% | 28                        | 32.2% | 29       | 17.4% |
| Other                                                                        | 70                  | 4.2%  | 204                       | 8.2%  | 17              | 6.1%  | --                        | --    | --       | --    |
| <b>Employment</b>                                                            |                     |       |                           |       |                 |       |                           |       |          |       |
| Part-time                                                                    | 363                 | 17.7% | 574                       | 18.5% | 28              | 8.6%  | 22                        | 19.3% | 39       | 18.4% |
| Full-time                                                                    | 539                 | 26.2% | 675                       | 21.7% | 31              | 9.6%  | 27                        | 23.7% | 55       | 25.9% |
| Unemployed                                                                   | 685                 | 33.3% | 1251                      | 40.3% | 184             | 56.8% | 35                        | 30.7% | 70       | 33.0% |
| Other                                                                        | 49                  | 2.4%  | 68                        | 2.2%  | --              | --    | --                        | --    | --       | --    |
| Unknown                                                                      | 419                 | 20.4% | 536                       | 17.3% | --              | --    | --                        | --    | --       | --    |
| <b>Education</b>                                                             |                     |       |                           |       |                 |       |                           |       |          |       |
| High school, not completed                                                   | 259                 | 12.6% | 792                       | 25.5% | 112             | 34.6% | --                        | --    | 57       | 26.9% |
| High school, completed                                                       | 439                 | 21.4% | 759                       | 24.5% | 66              | 20.4% | 29                        | 25.4% | 49       | 23.1% |
| GED                                                                          | 247                 | 12.0% | 403                       | 13.0% | 48              | 14.8% | --                        | --    | 17       | 8.0%  |
| Some college or higher education                                             | 631                 | 30.7% | 688                       | 22.2% | 36              | 11.1% | 12                        | 10.5% | 33       | 15.6% |
| Unknown                                                                      | 479                 | 23.3% | 462                       | 14.9% | 52              | 16.0% | 28                        | 24.6% | 45       | 21.2% |
| <b>Children</b>                                                              |                     |       |                           |       |                 |       |                           |       |          |       |
| 0 Children                                                                   | 703                 | 34.2% | 729                       | 23.5% | 75              | 23.1% | 38                        | 33.3% | 66       | 31.1% |
| 1 Child                                                                      | 330                 | 16.1% | 564                       | 18.2% | 61              | 18.8% | --                        | --    | 25       | 11.8% |
| 2 Children                                                                   | 238                 | 11.6% | 470                       | 15.1% | 52              | 16.0% | --                        | --    | 31       | 14.6% |
| 3+ Children                                                                  | 264                 | 12.8% | 859                       | 27.7% | 84              | 25.9% | --                        | --    | 36       | 17.0% |
| Unknown                                                                      | 520                 | 25.3% | 482                       | 15.5% | 52              | 16.0% | 32                        | 28.1% | 46       | 21.7% |
| <b>Marital Status</b>                                                        |                     |       |                           |       |                 |       |                           |       |          |       |
| Married                                                                      | 157                 | 7.6%  | 197                       | 6.3%  | 14              | 4.3%  | --                        | --    | 17       | 8.0%  |
| Single                                                                       | 1473                | 71.7% | 2415                      | 77.8% | 252             | 77.8% | --                        | --    | 156      | 73.6% |
| Unknown                                                                      | 425                 | 20.7% | 492                       | 15.9% | 58              | 17.9% | 30                        | 26.3% | 39       | 18.4% |

Counts for people on high-level probation any time during 2016 and with 6+ months full-benefit public health insurance eligibility between 2013 and 2016 in Minnesota

Includes people with violation status, but not warrant status.

Minnesota Health Care Plans (MHCP) includes any full or partial month while on high-level probation in 2016. Counts are not exclusive and do not add up to 100 percent.



**STROBE 2007 (v4) Statement—Checklist of items that should be included in reports of *cross-sectional studies***

| Section/Topic            | Item # | Recommendation                                                                                                                                                                       | Reported on page #                              |
|--------------------------|--------|--------------------------------------------------------------------------------------------------------------------------------------------------------------------------------------|-------------------------------------------------|
| Title and abstract       | 1      | (a) Indicate the study's design with a commonly used term in the title or the abstract                                                                                               | Title. <b>Page 1.</b>                           |
|                          |        | (b) Provide in the abstract an informative and balanced summary of what was done and what was found                                                                                  | Abstract, Methods and Findings. <b>Page 2.</b>  |
| <b>Introduction</b>      |        |                                                                                                                                                                                      |                                                 |
| Background/rationale     | 2      | Explain the scientific background and rationale for the investigation being reported                                                                                                 | Introduction, paragraphs 1-3. <b>Pages 4-5.</b> |
| Objectives               | 3      | State specific objectives, including any prespecified hypotheses                                                                                                                     | Introduction, paragraph 4. <b>Page 5.</b>       |
| <b>Methods</b>           |        |                                                                                                                                                                                      |                                                 |
| Study design             | 4      | Present key elements of study design early in the paper                                                                                                                              | Methods, paragraphs 1-3. <b>Pages 5-7.</b>      |
| Setting                  | 5      | Describe the setting, locations, and relevant dates, including periods of recruitment, exposure, follow-up, and data collection                                                      | Methods, paragraphs 1-3. <b>Pages 5-7.</b>      |
| Participants             | 6      | (a) Give the eligibility criteria, and the sources and methods of selection of participants                                                                                          | Methods, paragraphs 1-2. <b>Pages 5-6.</b>      |
| Variables                | 7      | Clearly define all outcomes, exposures, predictors, potential confounders, and effect modifiers. Give diagnostic criteria, if applicable                                             | Methods, paragraphs 5-7. <b>Pages 7-8</b>       |
| Data sources/measurement | 8*     | For each variable of interest, give sources of data and details of methods of assessment (measurement). Describe comparability of assessment methods if there is more than one group | Methods, paragraphs 3 and 5. <b>Pages 7-8.</b>  |
| Bias                     | 9      | Describe any efforts to address potential sources of bias                                                                                                                            | Methods,                                        |

|                        |     |                                                                                                                                                                                                   |                                                                                                                   |
|------------------------|-----|---------------------------------------------------------------------------------------------------------------------------------------------------------------------------------------------------|-------------------------------------------------------------------------------------------------------------------|
|                        |     |                                                                                                                                                                                                   | paragraphs 10-11.<br><b>Pages 9-10.</b>                                                                           |
| Study size             | 10  | Explain how the study size was arrived at                                                                                                                                                         | Methods, paragraph 1. <b>Page 5.</b>                                                                              |
| Quantitative variables | 11  | Explain how quantitative variables were handled in the analyses. If applicable, describe which groupings were chosen and why                                                                      | Methods, paragraphs 5-7.<br><b>Pages 7-8.</b>                                                                     |
| Statistical methods    | 12  | (a) Describe all statistical methods, including those used to control for confounding                                                                                                             | Methods, paragraphs 8-11.<br><b>Pages 9-10.</b>                                                                   |
|                        |     | (b) Describe any methods used to examine subgroups and interactions                                                                                                                               | Methods, paragraph 10. <b>Pages 9.</b>                                                                            |
|                        |     | (c) Explain how missing data were addressed                                                                                                                                                       | Methods, paragraph 10. <b>Page 9.</b>                                                                             |
|                        |     | (d) If applicable, describe analytical methods taking account of sampling strategy                                                                                                                | N/A                                                                                                               |
|                        |     | (e) Describe any sensitivity analyses                                                                                                                                                             | N/A                                                                                                               |
| <b>Results</b>         |     |                                                                                                                                                                                                   |                                                                                                                   |
| Participants           | 13* | (a) Report numbers of individuals at each stage of study—eg numbers potentially eligible, examined for eligibility, confirmed eligible, included in the study, completing follow-up, and analysed | Results, paragraph 1. <b>Page 10.</b>                                                                             |
|                        |     | (b) Give reasons for non-participation at each stage                                                                                                                                              | Methods, paragraph 1. <b>Page 5.</b>                                                                              |
|                        |     | (c) Consider use of a flow diagram                                                                                                                                                                | N/A                                                                                                               |
| Descriptive data       | 14* | (a) Give characteristics of study participants (eg demographic, clinical, social) and information on exposures and potential confounders                                                          | Results, paragraph 1<br>Table 1. <b>Page 10.</b>                                                                  |
|                        |     | (b) Indicate number of participants with missing data for each variable of interest                                                                                                               | Some sociodemographic variables had missing data, 'unknown' noted in Table 1. <b>Page 17.</b><br>N/A for adjusted |

|                   |     |                                                                                                                                                                                                              |                                                                                                                                                          |
|-------------------|-----|--------------------------------------------------------------------------------------------------------------------------------------------------------------------------------------------------------------|----------------------------------------------------------------------------------------------------------------------------------------------------------|
|                   |     |                                                                                                                                                                                                              | analyses.                                                                                                                                                |
| Outcome data      | 15* | Report numbers of outcome events or summary measures                                                                                                                                                         | Probation group:<br>Results, paragraph 3;<br>Table 3. <b>Pages 10, 19.</b><br>Comparison group:<br>Results, paragraph 4-5; Table 4. <b>Pages 11, 20.</b> |
| Main results      | 16  | (a) Give unadjusted estimates and, if applicable, confounder-adjusted estimates and their precision (eg, 95% confidence interval). Make clear which confounders were adjusted for and why they were included | Methods, paragraph 10; Results, paragraph 3-4, Table 3, Table 4. <b>Pages 9-11, 19-20.</b>                                                               |
|                   |     | (b) Report category boundaries when continuous variables were categorized                                                                                                                                    | N/A                                                                                                                                                      |
|                   |     | (c) If relevant, consider translating estimates of relative risk into absolute risk for a meaningful time period                                                                                             | N/A                                                                                                                                                      |
| Other analyses    | 17  | Report other analyses done—eg analyses of subgroups and interactions, and sensitivity analyses                                                                                                               | Results, paragraph 6. <b>Page 12.</b>                                                                                                                    |
| <b>Discussion</b> |     |                                                                                                                                                                                                              |                                                                                                                                                          |
| Key results       | 18  | Summarise key results with reference to study objectives                                                                                                                                                     | Discussion, paragraph 1. <b>Page 12.</b>                                                                                                                 |
| Limitations       | 19  | Discuss limitations of the study, taking into account sources of potential bias or imprecision. Discuss both direction and magnitude of any potential bias                                                   | Discussion, paragraph 4. <b>Pages 14-15.</b>                                                                                                             |
| Interpretation    | 20  | Give a cautious overall interpretation of results considering objectives, limitations, multiplicity of analyses, results from similar studies, and other relevant evidence                                   | Discussion, paragraphs 2-3. <b>Pages 13-14.</b>                                                                                                          |
| Generalisability  | 21  | Discuss the generalisability (external validity) of the study results                                                                                                                                        | Discussion, paragraph 4. <b>Pages 14-15.</b>                                                                                                             |

1  
2  
3  
4  
5  
6  
7  
8  
9  
10  
11  
12  
13  
14  
15  
16  
17  
18  
19  
20  
21  
22  
23  
24  
25  
26  
27  
28  
29  
30  
31  
32  
33  
34  
35  
36  
37  
38  
39  
40  
41  
42  
43  
44  
45  
46

|                          |    |                                                                                                                                                               |                                       |
|--------------------------|----|---------------------------------------------------------------------------------------------------------------------------------------------------------------|---------------------------------------|
| <b>Other information</b> |    |                                                                                                                                                               |                                       |
| Funding                  | 22 | Give the source of funding and the role of the funders for the present study and, if applicable, for the original study on which the present article is based | Funding, paragraph 1. <b>Page 15.</b> |

\*Give information separately for cases and controls in case-control studies and, if applicable, for exposed and unexposed groups in cohort and cross-sectional studies.

**Note:** An Explanation and Elaboration article discusses each checklist item and gives methodological background and published examples of transparent reporting. The STROBE checklist is best used in conjunction with this article (freely available on the Web sites of PLoS Medicine at <http://www.plosmedicine.org/>, Annals of Internal Medicine at <http://www.annals.org/>, and Epidemiology at <http://www.epidem.com/>). Information on the STROBE Initiative is available at [www.strobe-statement.org](http://www.strobe-statement.org).

For peer review only
