# Supplementary material for: Health profiles and racial disparities among individuals on probation in Hennepin County, Minnesota, 2016: a cross-sectional study
Source: PubMed Central journal article supplement — BMJ Open. 2021 Sep 2;11(9):e047930. doi: 10.1136/bmjopen-2020-047930 (PMC8413954; doi:10.1136/bmjopen-2020-047930), 2021-09-02
Supplement: bmjopen-2020-047930supp001.pdf [file bmjopen-2020-047930supp001.pdf]

**Supplemental 1.** Demographics and public health insurance prevalence of individuals on high-level probation in Hennepin County, Minnesota, any time during 2016 and met MHCP enrollment criteria by race and ethnicity.

| Cohort                                                                       | HC probation cohort |       |                           |       |                 |       |                           |       |          |       |
|------------------------------------------------------------------------------|---------------------|-------|---------------------------|-------|-----------------|-------|---------------------------|-------|----------|-------|
|                                                                              | White, non-Hispanic |       | Black or African American |       | Native American |       | Asian or Pacific Islander |       | Hispanic |       |
|                                                                              | n                   | %     | n                         | %     | n               | %     | n                         | %     | n        | %     |
| High-level probation meeting enrollment criteria                             | 2055                | 35.0% | 3104                      | 52.9% | 324             | 5.5%  | 114                       | 1.9%  | 212      | 3.6%  |
| Median age                                                                   | 35.4                |       | 31.5                      |       | 32.7            |       | 32.3                      |       | 29.2     |       |
| Average age                                                                  | 37.7                |       | 34.4                      |       | 34.7            |       | 35.2                      |       | 32.6     |       |
| Male                                                                         | 1580                | 76.9% | 2629                      | 84.7% | 201             | 62.0% | 97                        | 85.1% | 175      | 82.5% |
| <b>Health Insurance Enrollment (While on high-level probation in 2016)</b>   |                     |       |                           |       |                 |       |                           |       |          |       |
| Any Minnesota Health Care Plan (MHCP)                                        | 1821                | 88.6% | 2670                      | 86.0% | 292             | 90.1% | 95                        | 83.3% | 188      | 88.7% |
| Consolidated treatment fund                                                  | 466                 | 22.7% | 666                       | 21.5% | 129             | 39.8% | 24                        | 21.1% | 55       | 25.9% |
| Any full-benefit MHCP                                                        | 1769                | 86.1% | 2558                      | 82.4% | 282             | 87.0% | 92                        | 80.7% | 181      | 85.4% |
| Medicaid                                                                     | 1676                | 81.6% | 2487                      | 80.1% | 279             | 86.1% | 87                        | 76.3% | 167      | 78.8% |
| MinnesotaCare                                                                | 141                 | 6.9%  | 97                        | 3.1%  | --              | --    | --                        | --    | 18       | 8.5%  |
| <b>Medicaid Eligibility Types (among those enrolled in Medicaid in 2016)</b> |                     |       |                           |       |                 |       |                           |       |          |       |
| Expansion                                                                    | 1218                | 72.7% | 1524                      | 61.3% | 191             | 68.5% | 54                        | 62.1% | 116      | 69.5% |
| Disability, no Medicare/SS                                                   | 107                 | 6.4%  | 323                       | 13.0% | 23              | 8.2%  | --                        | --    | --       | --    |
| Disability, with Medicare/SS                                                 | 129                 | 7.7%  | 177                       | 7.1%  | --              | --    | --                        | --    | --       | --    |
| Parent                                                                       | 247                 | 14.7% | 441                       | 17.7% | 50              | 17.9% | 28                        | 32.2% | 29       | 17.4% |
| Other                                                                        | 70                  | 4.2%  | 204                       | 8.2%  | 17              | 6.1%  | --                        | --    | --       | --    |
| <b>Employment</b>                                                            |                     |       |                           |       |                 |       |                           |       |          |       |
| Part-time                                                                    | 363                 | 17.7% | 574                       | 18.5% | 28              | 8.6%  | 22                        | 19.3% | 39       | 18.4% |
| Full-time                                                                    | 539                 | 26.2% | 675                       | 21.7% | 31              | 9.6%  | 27                        | 23.7% | 55       | 25.9% |
| Unemployed                                                                   | 685                 | 33.3% | 1251                      | 40.3% | 184             | 56.8% | 35                        | 30.7% | 70       | 33.0% |
| Other                                                                        | 49                  | 2.4%  | 68                        | 2.2%  | --              | --    | --                        | --    | --       | --    |
| Unknown                                                                      | 419                 | 20.4% | 536                       | 17.3% | --              | --    | --                        | --    | --       | --    |
| <b>Education</b>                                                             |                     |       |                           |       |                 |       |                           |       |          |       |
| High school, not completed                                                   | 259                 | 12.6% | 792                       | 25.5% | 112             | 34.6% | --                        | --    | 57       | 26.9% |
| High school, completed                                                       | 439                 | 21.4% | 759                       | 24.5% | 66              | 20.4% | 29                        | 25.4% | 49       | 23.1% |
| GED                                                                          | 247                 | 12.0% | 403                       | 13.0% | 48              | 14.8% | --                        | --    | 17       | 8.0%  |
| Some college or higher education                                             | 631                 | 30.7% | 688                       | 22.2% | 36              | 11.1% | 12                        | 10.5% | 33       | 15.6% |
| Unknown                                                                      | 479                 | 23.3% | 462                       | 14.9% | 52              | 16.0% | 28                        | 24.6% | 45       | 21.2% |
| <b>Children</b>                                                              |                     |       |                           |       |                 |       |                           |       |          |       |
| 0 Children                                                                   | 703                 | 34.2% | 729                       | 23.5% | 75              | 23.1% | 38                        | 33.3% | 66       | 31.1% |
| 1 Child                                                                      | 330                 | 16.1% | 564                       | 18.2% | 61              | 18.8% | --                        | --    | 25       | 11.8% |
| 2 Children                                                                   | 238                 | 11.6% | 470                       | 15.1% | 52              | 16.0% | --                        | --    | 31       | 14.6% |
| 3+ Children                                                                  | 264                 | 12.8% | 859                       | 27.7% | 84              | 25.9% | --                        | --    | 36       | 17.0% |
| Unknown                                                                      | 520                 | 25.3% | 482                       | 15.5% | 52              | 16.0% | 32                        | 28.1% | 46       | 21.7% |
| <b>Marital Status</b>                                                        |                     |       |                           |       |                 |       |                           |       |          |       |
| Married                                                                      | 157                 | 7.6%  | 197                       | 6.3%  | 14              | 4.3%  | --                        | --    | 17       | 8.0%  |
| Single                                                                       | 1473                | 71.7% | 2415                      | 77.8% | 252             | 77.8% | --                        | --    | 156      | 73.6% |
| Unknown                                                                      | 425                 | 20.7% | 492                       | 15.9% | 58              | 17.9% | 30                        | 26.3% | 39       | 18.4% |

Counts for people on high-level probation any time during 2016 and with 6+ months full-benefit public health insurance eligibility between 2013 and 2016 in Minnesota

Includes people with violation status, but not warrant status.

Minnesota Health Care Plans (MHCP) includes any full or partial month while on high-level probation in 2016. Counts are not exclusive and do not add up to 100 percent.
